1 **The long noncoding RNA Charme supervises cardiomyocyte maturation by**  
2 **controlling cell differentiation programs in the developing heart**

3

4 **Valeria Taliani<sup>1‡†</sup>, Giulia Buonaiuto<sup>1†</sup>, Fabio Desideri<sup>2</sup>, Adriano Setti<sup>1</sup>, Tiziana Santini<sup>1</sup>, Silvia Galfrè<sup>2</sup>,**  
5 **Leonardo Schirone<sup>3</sup>, Davide Mariani<sup>4</sup>, Giacomo Frati<sup>3</sup>, Valentina Valenti<sup>3</sup>, Sebastiano Sciarretta<sup>3</sup>,**  
6 **Emerald Perlas<sup>5</sup>, Carmine Nicoletti<sup>6</sup>, Antonio Musarò<sup>6</sup>, Monica Ballarino<sup>1</sup>**

7 <sup>1</sup>Department of Biology and Biotechnologies “*Charles Darwin*”, Sapienza University of Rome, Rome, Italy;

8 <sup>2</sup>Center for Life Nano- & Neuro-Science of Istituto Italiano di Tecnologia (IIT), 00161, Rome, Italy;

9 <sup>3</sup>Department of Medical Surgical Sciences and Biotechnologies, Sapienza University of Rome, Latina, Italy;

10 <sup>4</sup>Center for Human Technologies, Istituto Italiano di Tecnologia (IIT), Genova, Italy;

11 <sup>5</sup>EMBL-Rome, Epigenetics and Neurobiology Unit, Monterotondo, Italy;

12 <sup>6</sup>DAHFMO-Unit of Histology and Medical Embryology, Laboratory affiliated to Istituto Pasteur Italia-  
13 Fondazione Cenci Bolognetti, Sapienza University of Rome, Rome, Italy.

14

15 *Corresponding author:* Monica Ballarino

16 *e-mail address:* [monica.ballarino@uniroma1.it](mailto:monica.ballarino@uniroma1.it); *phone:* +39 06 49912201

17

18 <sup>‡</sup>Present address: EMBL, Genome Biology Unit, Heidelberg, Germany

19 <sup>†</sup>These authors contributed equally to this work

20 **Running Head**

21 Charme functions during development

22 **Key Words**

23 ncRNA; LncRNA; Development; Muscle; Myogenesis; Cardiomyogenesis; Heart

24

25

26

## 27 **ABSTRACT**

28 Long noncoding RNAs (lncRNAs) are emerging as critical regulators of heart physiology and disease,  
29 although the studies unveiling their modes-of-action are still limited to few examples. We recently  
30 identified pCharme, a chromatin-associated lncRNA whose functional knockout in mice results in  
31 defective myogenesis and morphological remodelling of the cardiac muscle. Here, we combined Cap-  
32 Analysis of Gene Expression (CAGE), single-cell (sc)RNA sequencing and whole-mount *in situ*  
33 hybridization analyses to study pCharme cardiac expression. Since the early steps of  
34 cardiomyogenesis, we found the lncRNA being specifically restricted to cardiomyocytes, where it  
35 assists the formation of specific nuclear condensates containing MATR3, as well as important RNAs  
36 for cardiac development. In line with the functional significance of these activities, pCharme ablation  
37 in mice results in a delayed maturation of cardiomyocytes, which ultimately leads to morphological  
38 alterations of the myocardium and ventricular hypo-trabeculation. Since congenital anomalies in  
39 myocardium are clinically relevant in humans and predispose patients to major complications, the  
40 identification of novel genes controlling cardiac morphology becomes crucial. Our study offers  
41 unique insights into a novel lncRNA-mediated regulatory mechanism promoting cardiomyocyte  
42 maturation and bears relevance to Charme locus for future theranostic applications.

43

## 44 **INTRODUCTION**

45 In all vertebrates, heart development occurs through a cascade of events in which a subtle equilibrium  
46 between proliferation, migration, and differentiation ultimately leads precursor cells to mature into  
47 all the major cardiac cell types ([Bruneau 2013](#); [Moorman and Christoffels 2003](#)). At the molecular  
48 level, the execution of the developmental program is governed by the dynamic interplay of several  
49 cardiac regulators, whose expression and functions are coordinated in time and space. Alteration of  
50 this process results in abnormal cardiac morphogenesis and other congenital heart defects that in  
51 humans represent the most common types of birth defects and cause of infant death ([Zimmerman et](#)

52 [al., 2020](#); [Srivastava, 2006](#); [Center for Disease Control and Prevention, 2020](#)). Mutations of  
53 transcription factors and their protein cofactors have emerged as causative of a broad spectrum of  
54 heart malformations, although only 15-20% of all congenital heart defects have been associated to  
55 known genetic conditions ([Morton et al., 2022](#); [Kodo et al., 2009](#); [Bouveret et al., 2015](#); [Ang et al.,](#)  
56 [2016](#)). The need to find more targets for diagnosis and therapy has therefore evoked interest in new  
57 categories of disease-causing genes, whose discovery has been accelerated by impressive  
58 advancements in genomics. In this direction, improvements in the next-generation sequencing  
59 technologies have revolutionised many areas of the biomedical research, including cardiology, by the  
60 discovery of long noncoding RNA (lncRNAs) ([Mattick et al., 2004](#); [Cipriano et al., 2018](#), [Rinn and](#)  
61 [Chang 2012](#); [Ulitsky and Bartel 2013](#); [Yao et al., 2019](#)). LncRNAs form a heterogeneous class of  
62 non-protein coding transcripts, longer than 200 nucleotides, participating in many physiological (i.e.  
63 cell stemness, differentiation or tissue development) and pathological (i.e. cancer, inflammation,  
64 cardiovascular or neurodegeneration) processes ([Azad et al., 2021](#); [Hu et al., 2018](#); [Riva et al., 2016](#)).  
65 In the heart, several biologically relevant lncRNAs have been identified, with functions related to  
66 aging ([Jusic et al., 2022](#)) and regeneration ([Pagano et al., 2020](#); [Wang et al., 2021](#)). Specifically for  
67 cardiac development ([Pinheiro et al., 2021](#)), most of the lncRNA-mediated mechanisms were  
68 dissected by cell culture studies ([Klattenhoff et al., 2013](#); [Ounzain et al., 2015](#); [Kim et al., 2021](#)),  
69 while *in vivo* characterizations remained limited to few instances ([Grote et al. 2013](#); [Anderson et al.,](#)  
70 [2016](#); [Ritter et al., 2019](#); [Hazra,R,et al., 2022](#)).

71 The importance of lncRNA for adult heart homeostasis has been often described by linking their  
72 aberrant expression to cardiac anomalies ([Han et al., 2014](#); [Wang et al., 2016](#); [Ballarino et al., 2018](#);  
73 [Han et al., 2019](#); [Ponnusamy et al., 2019](#); [Anderson et al., 2021](#)). Along this line, in 2015 we identified  
74 a new collection of muscle-specific lncRNAs ([Ballarino et al., 2015](#)) and focused our attention on  
75 Charme (Chromatin architect of muscle expression) (mm9 chr7:51,728,798-51,740,770), a  
76 mammalian conserved lncRNA gene, whose loss-of-function in mice causes progressive myopathy

77 and, intriguingly, congenital heart remodelling ([Ballarino et al., 2018](#)). Here, we look at the function  
78 of this lncRNA in a developmental window and assign an embryonal origin to the cardiac defects  
79 produced by its knockout. By using molecular and whole-tissue imaging approaches, we give an  
80 integrated view of Charme locus activation in the developing heart and show that the functional  
81 pCharme isoform, retaining intron-1, is expressed already in the fetal tissues, progressively dropping  
82 down after birth. Single-cell (sc)RNA sequencing analyses from available datasets also reveal a  
83 strong cell type-specific expression of pCharme in the embryonal heart, where it is restricted to  
84 cardiomyocytes (CM). In line with this specific location, high-throughput transcriptomic analyses  
85 combined with the phenotypic characterization of WT and Charme<sup>KO</sup> developing hearts, highlight a  
86 functional role of the lncRNA in CM maturation and in the developmental formation of trabeculated  
87 myocardium. Furthermore, high-throughput sequencing of RNA isolated from fetal cardiac biopsies  
88 upon cross-linking and immunoprecipitation (CLIP) of MATR3, a nuclear pCharme interactor  
89 ([Desideri et al., 2020](#)), reveals the existence of a specific RNA-rich condensate containing pCharme  
90 as well as RNAs for important regulators of embryo development, cardiac function, and  
91 morphogenesis. In accordance with the functional importance of the pCharme/MATR3 interaction in  
92 developing cardiomyocytes, the binding of these transcripts with MATR3 was altered in Charme<sup>KO</sup>  
93 hearts. Moreover, MATR3 depletion in mouse-derived cardiac primary cells leads to the down-  
94 regulation of such RNAs, which suggests an active crosstalk between MATR3, pCharme and cardiac  
95 regulatory pathways.

96 Understanding the basics of cardiac development from a lncRNA *point-of-view* is of interest not only  
97 for unravelling novel RNA-mediated circuitries but also for improving treatment options aimed at  
98 enhancing cardiomyogenic differentiation. Indeed, despite the recent advancements in generating  
99 cardiomyocytes from pluripotent stem cells through tissue engineering-based methods, most  
100 protocols produce immature cells, which lack many attributes of adult cardiomyocytes ([Uosaki et al.,](#)  
101 [2015](#)). Consequently, the cells generated cannot be used for efficient drug screening, modelling of

102 adult-onset disease, or as a source for cell replacement therapy. We identify here pCharme as a new  
103 non-coding regulator of cardiac maturation and characterise the molecular interactome acting with  
104 the lncRNA *in vivo*. This research not only advances our understanding of heart physiology but in the  
105 next few years may serve as a foundation for new human diagnostic and therapeutic approaches.

106

## 107 **RESULTS**

### 108 **Charme locus expression in developing mouse embryos and cardiomyocytes.**

109 Our earlier studies revealed the occurrence of muscle hyperplasia and cardiac remodelling upon the  
110 CRISPR/Cas9-mediated Charme loss-of-function in mice ([Ballarino et al., 2018](#); [Desideri et al.,](#)  
111 [2020](#)). Intriguingly, the morphological malformations were clearly displayed in both adult and  
112 neonatal mice, strongly suggesting possible roles for the lncRNA during embryogenesis. With the  
113 purpose to trace back the developmental origins of Charme functions, we started by analysing the  
114 whole collection of FANTOM5 mouse promoterome data to quantify transcription initiation events  
115 captured by CAGE-seq across the lncRNA locus ([Noguchi et al., 2017](#)). In addition to its cardiac  
116 specificity, this profiling revealed the highest expression of the locus during development (E11-E15)  
117 followed by a gradual decrease at postnatal stages (**Figure 1A** and **Supplementary File 1**). We then  
118 evaluated the expression of the two splice variants, pCharme and mCharme, produced by the locus at  
119 E15.5 and postnatally (day 2, after birth). RT-qPCR analyses with specific primers confirmed the  
120 CAGE output and revealed that both the isoforms are more expressed at the fetal than the postnatal  
121 stage (**Figure 1B**). More importantly, we found pCharme to be 50% more abundant than mCharme,  
122 which is particularly intriguing in consideration of the prominent role of the nuclear isoform  
123 previously shown in skeletal myogenesis ([Desideri et al., 2020](#)). Using *in-situ* hybridization (ISH)  
124 approaches, we then profiled by imaging the spatio-temporal expression of Charme during  
125 development. These analyses revealed an initial expression of Charme locus already in the tubular  
126 heart (**Figure 1C**, E8.5), within territories which will give rise to the future atria and ventricles (V),

127 with the inflow (IFT) and outflow (OFT) tracts displaying the highest signals. ISH also confirmed the  
128 expression of the locus at later stages of development, both in cardiac tissues and somites (S) (**Figure**  
129 **1C**, E13.5; **Figure 1-figure supplement 1A**). A similar expression pattern was found within intact  
130 embryos and fetal hearts by whole-mount *in-situ* hybridization (WISH) (**Figure 1D**). To note, specific  
131 signals were detected only in wild-type (Charme<sup>WT</sup>) heart muscles, whereas no signal was found in  
132 Charme knockout organs (Charme<sup>KO</sup>) (**Figure 1D**, left; **Figure 1-figure supplement 1B**), taken from  
133 our previously generated mice ([Ballarino et al., 2018](#)). As distinct cell subpopulations are known to  
134 form the heart, each one carrying out a specialised function in cardiac development and physiology  
135 ([de Soysa et al., 2019](#)), we then processed publicly available single-cell RNA sequencing (scRNA-  
136 seq) datasets from embryonal hearts (E12.5, [Jackson-Weaver et al., 2020](#)) for studying at a deeper  
137 resolution the locus expression across individual cell types. Upon clustering (**Figure 1E**, upper) the  
138 different cardiac cell-types based on the expression of representative marker genes ([Li et al., 2016](#);  
139 [Jackson-Weaver et al., 2020](#); [Franco et al., 2006](#); [Meilhac et al., 2018](#)) (**Figure 1-figure supplement**  
140 **1C-1E**), we found pCharme expression restricted to cardiomyocytes, with an almost identical  
141 distribution between the atrial (CM-A), ventricular (CM-V) and other (CM-VP, CM-IVS, CM-OFT)  
142 cell clusters (**Figure 1E**, lower).

143 These findings offered valuable input for exploring the possible integration of pCharme functions  
144 into pathways controlling the maturation of cardiomyocytes. In this direction, we analysed *in silico*  
145 the lncRNA promoter to search for transcription factors (TFs) acting as upstream regulators of  
146 pCharme expression in cardiomyocytes. In accordance with our previous findings ([Ballarino et al.,](#)  
147 [2015](#)), Jaspar database (<https://jaspar.genereg.net>; [Castro-Mondragon et al., 2022](#)) identified several  
148 MYOD1 *consensus* sites in the 1kb region upstream of pCharme transcriptional start site (TSS,  
149 **Figure 1F**), although it is known that this myogenic regulator is not expressed in the heart ([Olson,](#)  
150 [1993](#); [Buckingham et al., 2017](#)). To note, a very low number of *consensus* sites was found for  
151 ONECUT2, a TF involved in neurogenesis ([Aydin et al., 2019](#)). Searching for cardiac regulators, we

152 identified canonical motifs (**Figure 1-figure supplement 1F**) and enriched sites (**Figure 1F**) for the  
153 T-box transcription factor-5 (TBX5). In addition to being a key regulator of heart development,  
154 known to activate genes associated to CM maturation in early development and morphogenesis at  
155 later stages ([Nadadur et al., 2016](#); [Steimle et al., 2017](#)), TBX5 was recently found to control the  
156 expression of several lncRNAs ([Yang et al., 2017](#)), a subset of them intriguingly enriched, as for  
157 pCharme, in the chromatin fraction of cardiomyocytes ([Hall et al., 2021](#)). By further analysing the  
158 scRNA-seq dataset ([Jackson-Weaver et al., 2020](#)), we observed a positive and highly significant  
159 correlation between *Tbx5* and pCharme (**Figure 1G**, left) in CM, with some differences occurring  
160 across the CM cluster subtypes (see for instance CM-IVS/CM-OFT, **Figure 1G**, right). To note,  
161 pCharme positively correlates with markers of cardiomyocyte identity, Myosin light chain 2 (*My12*)  
162 and 4 (*My14*), while significant anticorrelation was found for the Kruppel like factor 2 (*Klf2*) and the  
163 Twist family BHLH transcription factor 1 (*Twist1*) transcripts, that respectively mark endothelial and  
164 neural crest cells ([Jackson-Weaver et al., 2020](#); [Li et al., 2016](#)).

165 To provide functional support to a possible role of TBX5 for pCharme transcription in CM, we  
166 examined available Chromatin Immunoprecipitation (ChIP)-sequencing (**Figure 1H**) and RNA-seq  
167 (**Figure 1I**) datasets from murine cardiomyocytes at progenitor (P-CM) and differentiated (D-CM)  
168 stages ([Luna-Zurita et al., 2016](#)). In both conditions, ChIP-seq analyses revealed the specific  
169 occupancy of TBX5 to highly conserved spots within the pCharme promoter, which increases with  
170 differentiation. However, while in differentiated cardiomyocytes pCharme expression was insensitive  
171 to TBX5 ablation, the lncRNA abundance was consistently decreased in TBX5 knockout progenitor  
172 cells (**Figure 1I**). As progenitor CM represent a cell resource for recapitulating *ex-vivo* the early  
173 establishment of the cardiac lineage and for mimicking cardiomyocyte development ([Kattman et al.,](#)  
174 [2011](#)), these results are consistent with the role of TBX5 for Charme transcription at fetal stages. The  
175 presence of *consensus* sites for other TFs (**Figure 1-figure supplement 1F**) and the known attitude  
176 of TBX5 to interact, physically and functionally, with several cardiac regulators ([Akerberg et al.,](#)

177 [2019](#)), also predict the possible contribution of other regulators to pCharme transcription which may  
178 act, in cooperation or not, with TBX5 during CM maturation.



**Figure 1.**

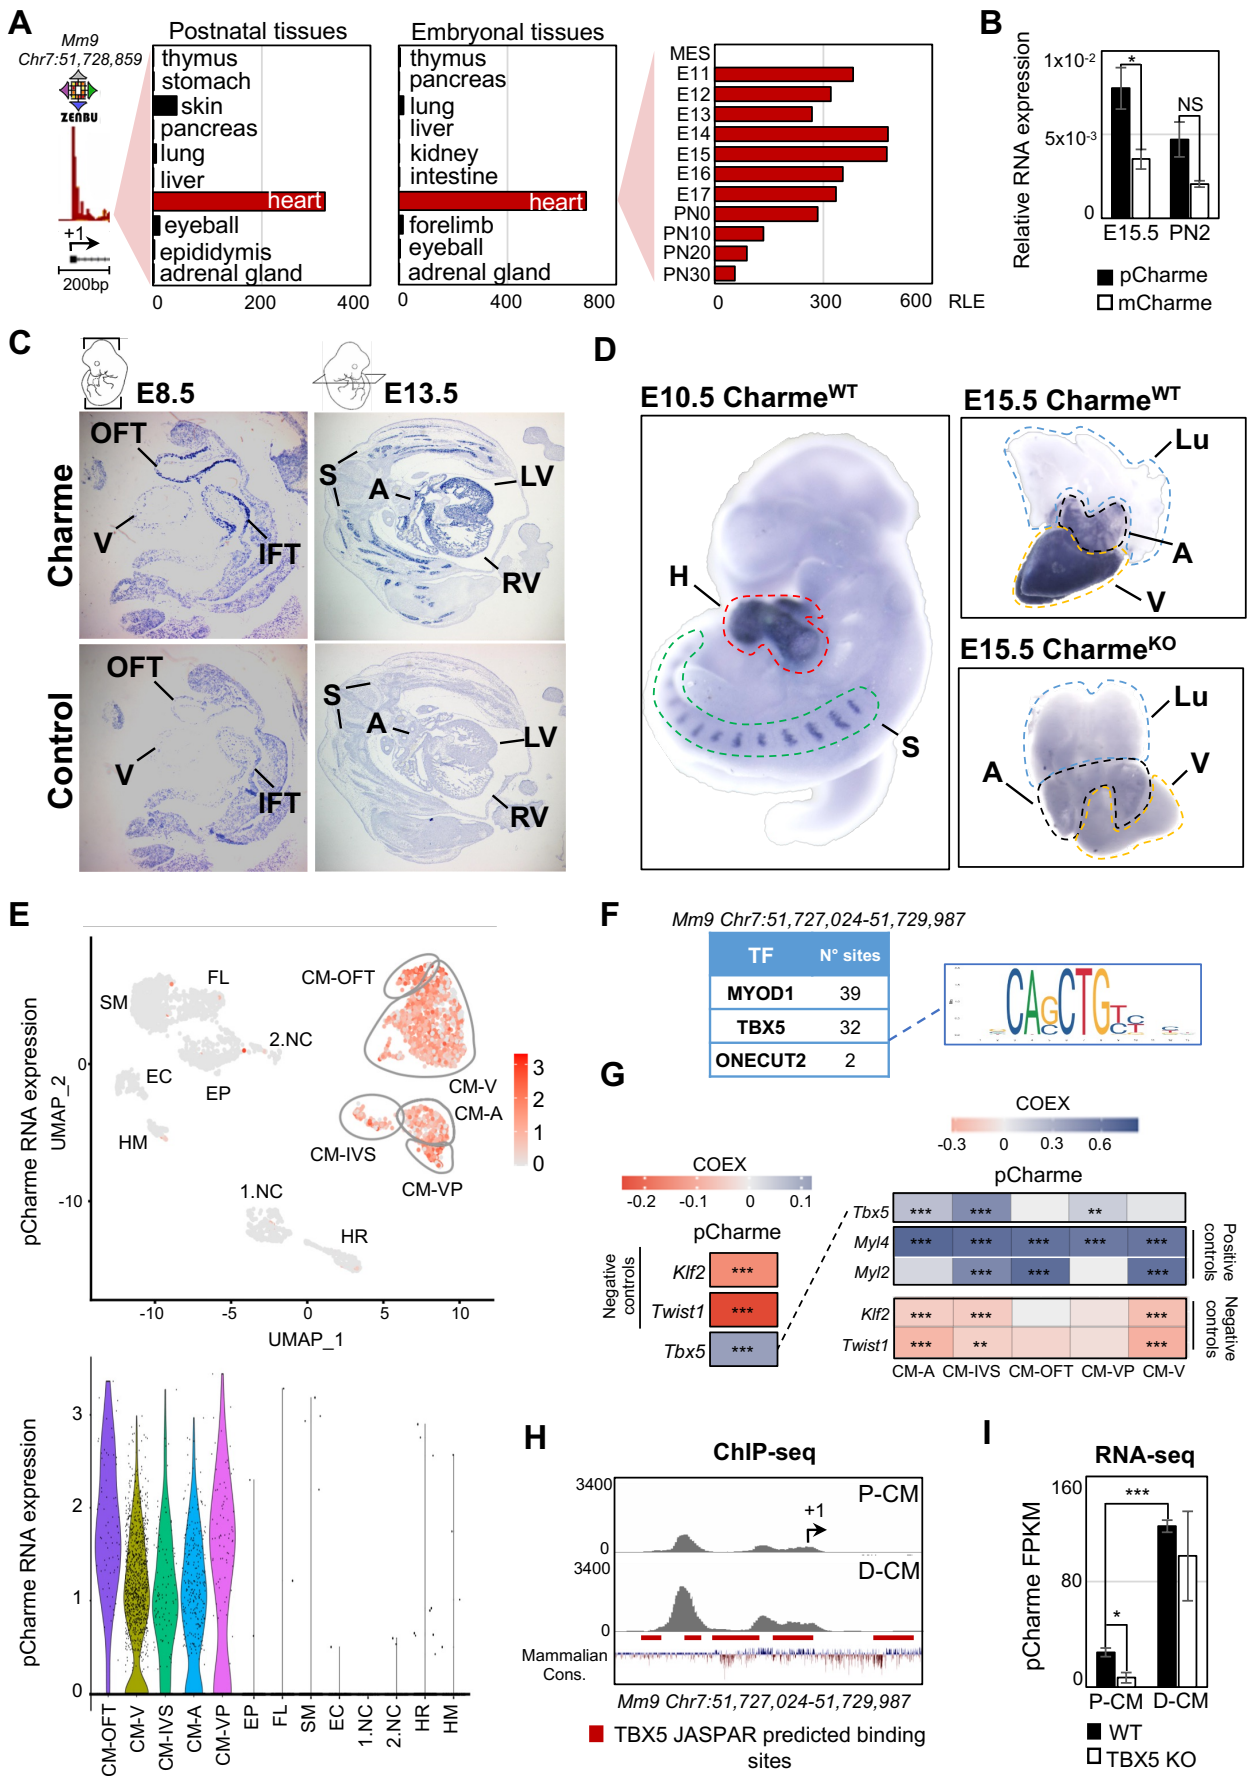

180 **Figure 1. Charme locus expression in developing mouse embryos and cardiomyocytes**

181 **A)** Transcriptional start site (TSS) usage analysis from FANTOM5 CAGE Phase1 and 2  
182 datasets (skeletal muscle is not included) on the last update of Zenbu browser  
183 (<https://fantom.gsc.riken.jp/zenbu/>; FANTOM5 Mouse mm9 promoterome)  
184 showing Charme locus expression in postnatal and embryonal body districts (left and middle panels)  
185 and during different stages of cardiac development (right panel, E11-PN30). MES=Mesoderm. Bars  
186 represent the Relative Logarithmic Expression (RLE) of the Tag Per Million values  
187 of Charme TSS usage in the specific samples.

188 **B)** Quantitative Reverse Transcription PCR (RT-qPCR) amplification of pCharme and mCharme  
189 isoforms in RNA extracts from Charme<sup>WT</sup> E15.5 and neonatal (PN2) hearts. Data were normalized to  
190 *Gapdh* mRNA and represent means  $\pm$  SEM of 3 pools.

191 **C)** *In-situ* hybridization (ISH) performed on embryonal cryo-sections using digoxigenin-labelled  
192 RNA antisense (Charme, upper panel) or sense (control, lower panel) probes against Charme.  
193 Representative images from two stages of embryonal development (E8.5 and E13.5) are shown. OFT:  
194 Outflow Tract; IFT: Inflow Tract; V: Ventricle; LV/RV: Left/Right Ventricle; A: Atria; S: Somites.

195 **D)** Whole-mount *in-situ* hybridization (WISH) performed on Charme<sup>WT</sup> intact embryos (E10.5, left  
196 panel) and Charme<sup>WT</sup> and Charme<sup>KO</sup> hearts at their definitive morphologies (E15.5, right panels).  
197 Signal is specifically detected in heart (H, red line) and somites (S, green line). Lungs (Lu, blue line)  
198 show no signal for Charme. The specificity of the staining can be appreciated by the complete absence  
199 of signal in explanted hearts from Charme<sup>KO</sup> mice (Ballarino et al., 2018). A: Atria (black line); V:  
200 Ventricles (yellow line).

201 **E)** Upper panel: UMAP plot showing pCharme expression in single-cell transcriptomes of embryonal  
202 (E12.5) hearts (Jackson-Weaver et al., 2020). Lower panel: Violin plot of pCharme expression in the  
203 different clusters (see Materials and Methods for details). CM: Cardiomyocytes, CM-A: Atrial-CM,  
204 CM-V: Ventricular-CM, ISV: Interventricular Septum, VP: Venous Pole, OFT: Outflow Tract, NC:

205 Neural Crest cells, EP: Epicardial cells, FL: Fibroblasts like cells, EC: Endothelial Cells, SM: Smooth  
206 Muscle cells, HM: Hemopoietic Myeloid cells, HR: Hemopoietic Red blood cells.

207 **F)** *In silico* analysis of MYOD1, TBX5 and ONECUT2 transcription factors (TF) binding  
208 sites using Jaspar 2022 (relative profile score threshold=80%) (Castro-Mondragon et al., 2022).  
209 MyoD1 and OneCut2 were used as positive and negative controls, respectively. N° sites =number of  
210 consensus motifs.

211 **G)** COTAN heatmap obtained using the whole scRNA-seq (left) and contrasted subsetted dataset  
212 (right) showing pCharme and *Tbx5* expression correlation (COEX). *Myl4* and *Myl2* were used as  
213 positive controls for cardiomyocytes while *Klf2* and *Twist1* as negative controls (markers of EC and  
214 NC, respectively). See Materials and Methods for details.

215 **H)** TBX5 ChIP-seq analysis across Charme promoter in murine precursors (P-CM) and differentiated  
216 cardiomyocytes (D-CM) (GSE72223, Luna-Zurita et al., 2016). The genomic coordinates of the  
217 promoter, the Charme TSS (+1, black arrow), the TBX5 JASPAR predicted binding sites  
218 (red lines) and the mammalian conservation track (Mammalian Cons.) from UCSC genome browser  
219 are reported.

220 **I)** Quantification of pCharme expression from RNA-seq analysis performed in wild type (WT) and  
221 TBX5 knockout (KO) murine P-CM and D-CM (SRP062699, Luna-Zurita et al., 2016). FPKM:  
222 Fragments Per Kilobase of transcript per Million mapped reads.

223 Data information: \*p < 0.05; \*\*\*p < 0.001; NS > 0.05, unpaired Student's t-test.

224

## 225 **Genome-wide profiling of cardiac Charme<sup>WT</sup> and Charme<sup>KO</sup> transcriptomes**

226 Over the years, we have accumulated strong evidence on the role played by pCharme in skeletal  
227 myogenesis ([Ballarino et al., 2018](#); [Desideri et al., 2020](#)), however important questions are still  
228 pending on the role of pCharme in cardiomyogenesis. As a first step towards the identification of the  
229 molecular signature underlying Charme-dependent cardiac anomalies, we performed a differential

230 gene expression analysis on transcriptome profiles from Charm<sup>WT</sup> and Charm<sup>KO</sup> neonatal (PN2)  
231 hearts (**Figure 2A; Figure 2-figure supplement 1A**). At this stage, the heart continues to change  
232 undergoing maturation, a process in which its morphology and cell composition keep evolving  
233 ([Padula et al., 2021](#); [Tian et al., 2017](#)).

234 RNA-seq analysis of whole hearts led to the identification of 913 differentially expressed genes  
235 (DEGs) (FDR<0.1, WT vs KO, **Supplementary File 2**), 573 of which were Up-regulated and 340  
236 were Down-regulated in Charm<sup>KO</sup> hearts (**Figure 2B; Supplementary File 2**). These results were  
237 confirmed by RT-qPCR analyses performed on gene subsets from independent biological replicates  
238 (**Figure 2C; Figure 2-figure supplement 1B**). Similar to pCharme activity in skeletal myocytes  
239 ([Ballarino et al., 2018](#)), we did not find DEGs within the neighbouring chromatin environment (370  
240 Kb around Charm) (**Figure 2-figure supplement 1C**).

241 A Gene Ontology (GO) term enrichment study was then applied separately to the Up- and Down-  
242 regulated DEGs. These analyses revealed that the Up-regulated DEGs were primarily enriched (FDR-  
243 values < 1,0E-10) in cell cycle and cell division categories (**Figure 2D**, left panel), which parallels  
244 with a slight increase in the number of KI-67<sup>+</sup> mitotic Charm<sup>KO</sup> nuclei, as quantified from neonatal  
245 cardiac sections (**Figure 2-figure supplement 1D**). The same study applied to the Down-regulated  
246 DEGs revealed their enrichment to more functional and morphogenetic GO categories and primarily  
247 referred to anatomical structure morphogenesis (FDR 5.77E-07) and circulatory system development  
248 (FDR 3.1338E-06) (**Figure 2D**, right panel). Interestingly, these top-ranked categories include TFs  
249 involved in pivotal steps of embryo development, such as *Smad3* ([Dunn et al., 2004](#)) and *Noct3*  
250 ([MacGrogan et al., 2018](#)), and functional components of cardiomyocytes, such as the voltage-  
251 dependent calcium channel subunit *Cacna1c* ([Wang et al., 2018](#)), and Myosin-18B (*Myo18B*), known  
252 to regulate cardiac sarcomere organisation ([Latham et al., 2020](#)). By expanding the analysis of these  
253 genes from neonatal to embryonal timepoints (E12.5, E15.5 and E18.5), we found that their  
254 expression significantly decreases upon pCharme ablation from the fetal E15.5 stage onward, as

255 compared to WT (**Figure 2E**). Similarly, the *Myh6/Myh7* ratio, which measures CM maturation  
256 ([England and Loughna, 2013](#); [Scheuermann and Boyer, 2013](#)) and that increases over the wild-type  
257 timepoints, displays a gradual decrease in the *Charme*<sup>KO</sup> hearts from E15.5 onward (**Figure 2F**). To  
258 note, the expression of cell-cycle and proliferation genes was not affected by p*Charme* ablation over  
259 the same developmental window (**Figure 2-figure supplement 1E**). Hence, their upregulation in  
260 neonatal KO hearts could be due to the impairment of cardiac maturation, which leads to a shift to a  
261 more fetal and proliferative state of cardiomyocytes upon birth.

262 Overall, our findings suggest that during cardiac development, p*Charme* regulation is achieved  
263 through the regulation of morphogenetic pathways whose dysregulation causes a pathological  
264 remodelling of the heart. Accordingly, histological analyses performed by haematoxylin and eosin  
265 staining of *Charme*<sup>WT</sup> and *Charme*<sup>KO</sup> cardiac cryo-sections (E15.5) showed a pronounced alteration  
266 of the myocardium, with a clear decrease of the area of the ventricular cavities (**Figure 2G**). The  
267 histological investigation was then deepened to the trabeculated myocardium, the tissue directly  
268 surrounding ventricle cavities. To this purpose, we performed immunofluorescence staining and  
269 western blot analysis for the natriuretic peptide A (NPPA) factor, a known marker of the embryonal  
270 trabecular cardiomyocytes ([Choquet et al., 2019](#); [Horsthuis et al., 2008](#)). In parallel, heart sections  
271 were analysed for cardiac vasculature, since i) the process of trabeculae formation is known to be  
272 temporally coupled with the formation of blood vessels during development ([Samsa et al., 2013](#)) and,  
273 importantly, ii) the “circulatory system development” category was among the main GO enriched for  
274 p*Charme* down-regulated targets. We found that, with respect to WT, mutant hearts display a  
275 significant reduction of NPPA<sup>+</sup> trabeculae (**Figure 2H**; **Figure 2- figure supplement 1F**), which  
276 parallels the decreased expression of the *Irx3* and *Sema3a* trabecular markers ([Choquet et al., 2019](#))  
277 (**Figure 2-figure supplement 1G**) as well as the diminished density of the capillary endothelium, as  
278 imaged by lectin staining (**Figure 2-figure supplement 1H**). Therefore, the fetal expression of  
279 p*Charme* is necessary for the achievement of morphogenetic programs important for CM maturation,

280 myocardial geometry and vascular network formation. Overall, these ensure the preservation of the  
281 cardiac function and structure in adulthood, as a progressive deterioration of the systolic function,  
282 which becomes significant at 9 months of age (**Figure 2-figure supplement 1I; Supplementary File**  
283 **3**), was observed in  $\text{Charne}^{\text{KO}}$  mice. To note, a similar alteration in heart efficiency was observed in  
284 the murine model with a specific mutation in the pCharne intron-1 ( $\text{Charne}^{\Delta\text{Int}}$ ) ([Desideri et al.,](#)  
285 [2020](#)), further confirming the distinct activity of this isoform in cardiac processes.

**Figure 2**

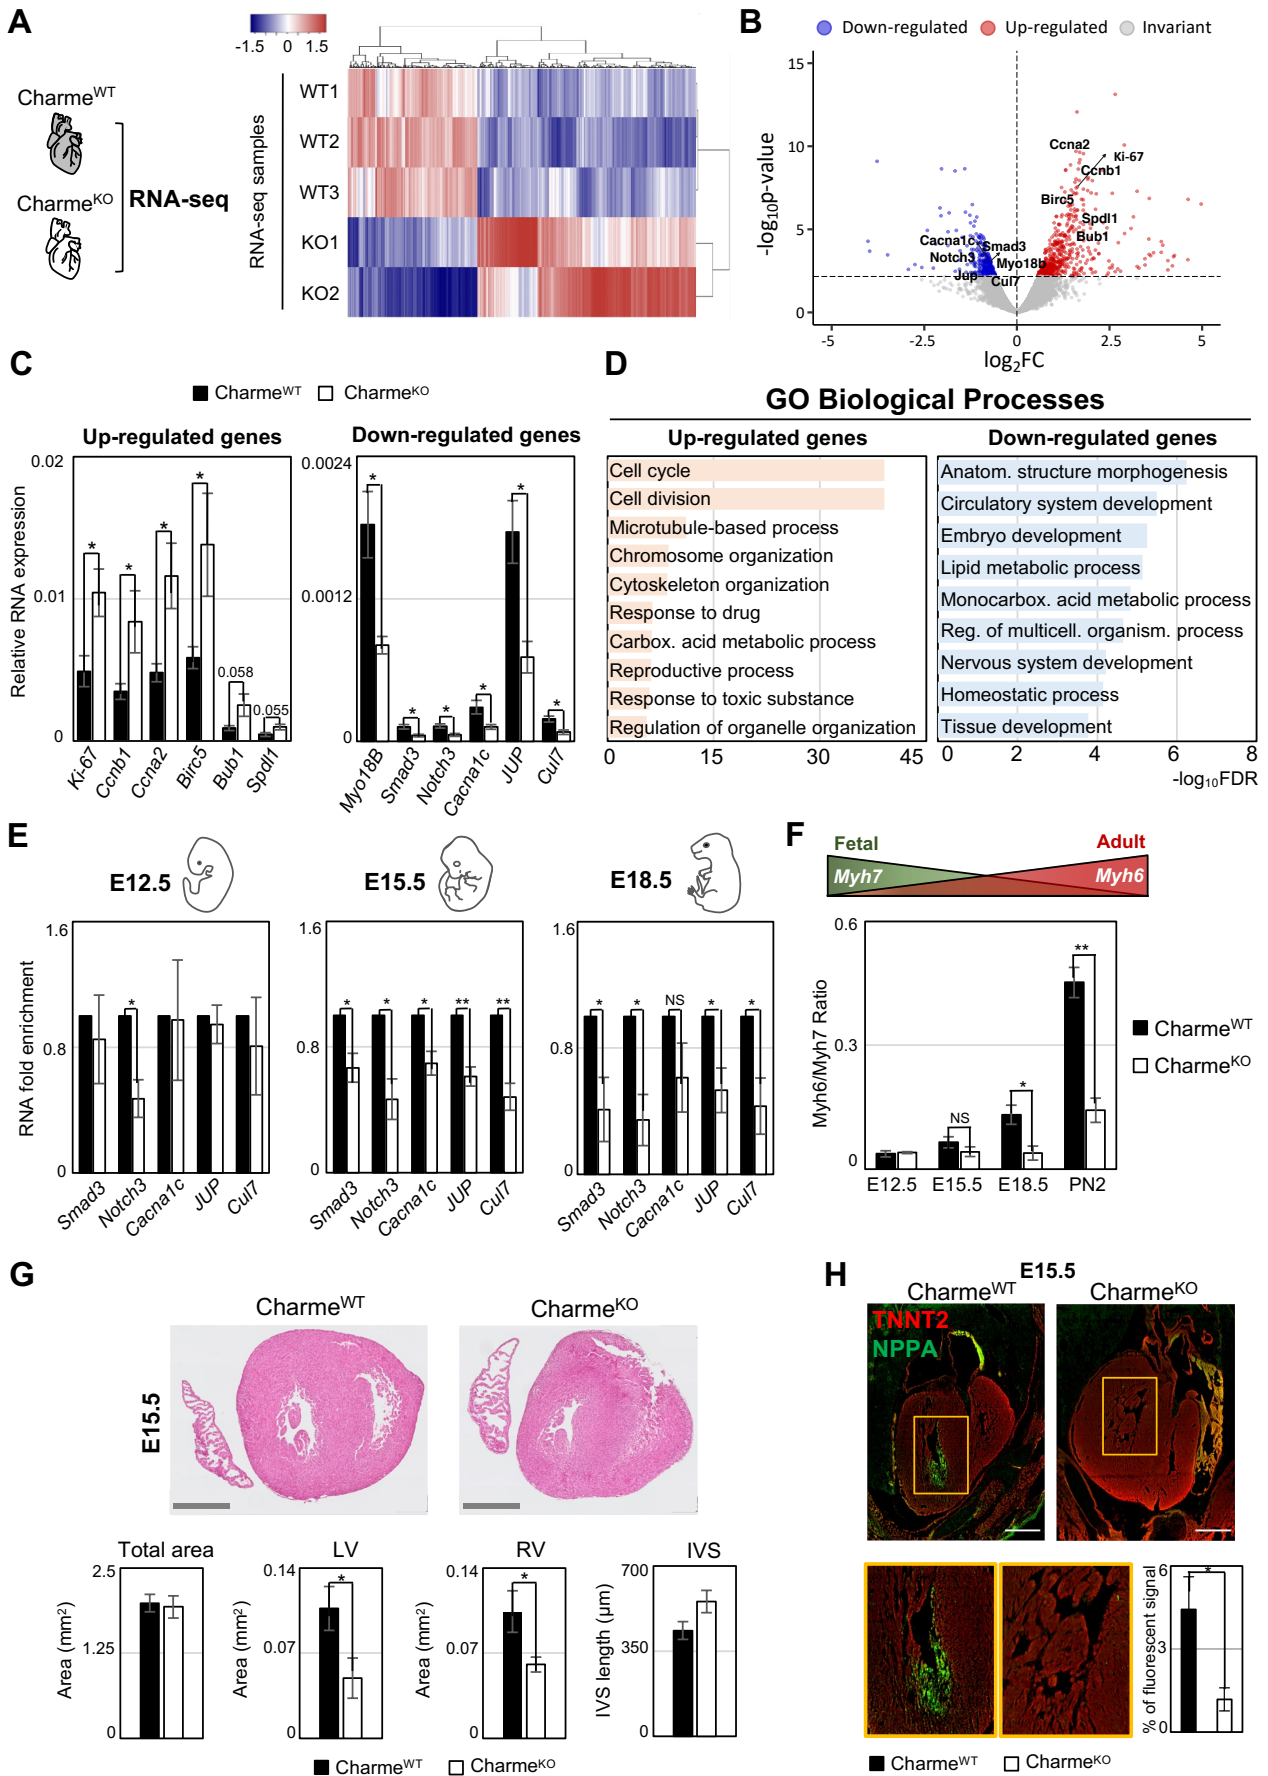

287 **Figure 2. Genome-wide profiling of cardiac *Charme*<sup>WT</sup> and *Charme*<sup>KO</sup> transcriptomes**

288 **A)** Heatmap visualization from RNA-seq analysis of *Charme*<sup>WT</sup> and *Charme*<sup>KO</sup> neonatal (PN2) hearts.

289 Plot was produced by heatmap3 ([https://cran.r-](https://cran.r-project.org/web/packages/heatmap3/vignettes/vignette.pdf)

290 [project.org/web/packages/heatmap3/vignettes/vignette.pdf](https://cran.r-project.org/web/packages/heatmap3/vignettes/vignette.pdf)). Expression values were calculated as

291 FPKM, were log<sub>2</sub>-transformed and mean-centered. FPKM: Fragments Per Kilobase of transcript per

292 Million mapped reads.

293 **B)** Volcano plots showing differential gene expression from transcriptome analysis of *Charme*<sup>WT</sup> vs

294 *Charme*<sup>KO</sup> PN2 hearts. Differentially expressed genes (DEGs) validated through RT-qPCR (**Figure**

295 **2C**) are in evidence. FC: Fold Change

296 **C)** RT-qPCR quantification of Up-regulated (left panel) and Down-regulated (right panel) DEGs in

297 *Charme*<sup>WT</sup> vs *Charme*<sup>KO</sup> neonatal hearts. Data were normalized to *Gapdh* mRNA and represent means

298 ± SEM of WT (n=5) vs KO (n=4) pools

299 **D)** Gene Ontology (GO) enrichment analysis performed by WEBGESTALT

300 (<http://www.webgestalt.org>) on Up-regulated (left panel) and Down-regulated (right panel) DEGs in

301 *Charme*<sup>WT</sup> vs *Charme*<sup>KO</sup> pools of neonatal hearts. Bars indicate the top categories of Biological

302 processes in decreasing order of  $-\log_{10}$ FDR. All the represented categories show a False Discovery

303 Rate (FDR) value <0.05.

304 **E)** RT-qPCR quantification of p*Charme* targets in *Charme*<sup>WT</sup> and *Charme*<sup>KO</sup> extracts from E12.5,

305 E15.5 and E18.5 hearts. DEGs belonging to the GO category “anatomical structure morphogenesis”

306 were considered for the analysis. Data were normalized to *Gapdh* mRNA and represent means ± SEM

307 of WT and KO (n=3) pools.

308 **F)** RT-qPCR quantification of the *Myh6/Myh7* ratio in *Charme*<sup>WT</sup> and *Charme*<sup>KO</sup> extracts from E12.5,

309 E15.5 and E18.5 and neonatal hearts. Data were normalized to *Gapdh* mRNA and represent means ±

310 SEM of WT and KO (n=3) pools. Schematic representation of the physiological *Myh6/Myh7*

311 expression trend is shown.



312 **G)** Upper panel: Haematoxylin-eosin staining from Charme<sup>WT</sup> and Charme<sup>KO</sup> E15.5 cardiac  
313 transverse sections. Scale bars: 500 μm. Lower panel: Quantification of the total area, the left and  
314 right ventricle cavities and the thickness of the interventricular septum (IVS) in Charme<sup>WT</sup> and  
315 Charme<sup>KO</sup> E15.5 hearts. For each genotype, data represent the mean ± SEM (n=3).

316 **H)** Representative images of Nppa (green) and TnnT2 (red) immunostaining in Charme<sup>WT</sup> and  
317 Charme<sup>KO</sup> (E15.5) cardiac sections. Regions of interest (ROI, orange squares) were digitally enlarged  
318 on the lower panels. Scale bar: 500 μm. Quantification of the area covered by the Nppa fluorescent  
319 signal is shown aside. Data represent the mean (%) ± SEM of WT (n=4) and KO (n=3).

320 Data information: \*p < 0.05; \*\*p < 0.01, NS > 0.05, unpaired Student's t-test

321

### 322 **pCharme nucleates the formation of RNA-rich condensates by interacting with MATR3 in fetal** 323 **cardiomyocytes.**

324 In differentiated myocytes, we previously demonstrated that CU-rich binding motifs inside pCharme  
325 coordinate the co-transcriptional recruitment and the subcellular localization of Matrin 3 (MATR3)  
326 ([Desideri et al., 2020](#)), a nuclear matrix RNA/DNA binding protein involved in multiple RNA  
327 biosynthetic processes ([Coelho et al., 2016](#); [Banerjee et al., 2017](#)) and recently shown to play a role  
328 in chromatin repositioning during development ([Cha et al., 2021](#)). Interestingly, MATR3 was found  
329 highly expressed in cardiomyocytes from newborn mice and heterozygous mutations in MATR3  
330 resulted in congenital heart defects ([Quintero-Rivera et al., 2015](#)). This raises the intriguing  
331 possibility that pCharme may play a role in cardiomyocyte maturation through MATR3. To examine  
332 this hypothesis, we first assessed the subcellular localization of pCharme in fetal (E15.5) hearts by  
333 biochemical fractionation. RT-qPCR analyses revealed that, in line with what was previously  
334 observed in skeletal muscle, in cardiomyocytes pCharme mainly localises in the nucleus, while the  
335 fully spliced mCharme is enriched in the cytoplasm (**Figure 3-figure supplement 1A**). We next  
336 applied high-resolution RNA-fluorescence *in situ* hybridization (RNA-FISH) to visualise pCharme

337 alone (**Figure 3A; Figure 3-figure supplement 1B**) or relatively to MATR3 through a combined  
338 immunofluorescence IF/RNA-FISH approach (**Figure 3B**). In agreement with the subcellular  
339 fractionation, the imaging experiments confirmed the nuclear localization of pCharme, which exhibits  
340 its typical punctuate pattern. Further analysis of the three-dimensional distribution of pCharme and  
341 MATR3 revealed a clear colocalization of their signals and the formation of nuclear condensates, as  
342 quantified by 3D Pearson's correlation coefficient applied on the overlapping signals (**Figure 3-**  
343 **figure supplement 1C**). Based on these results, we then tested if the presence of pCharme could  
344 influence the nuclear localization of MATR3. To this end, we performed MATR3 IF assays in wild-  
345 type and Charm<sup>KO</sup> fetal (E15.5) muscle biopsies and in spinal cord nuclei (**Figure 3C; Figure 3-**  
346 **figure supplement 1D-F**). A striking heterogeneous distribution of MATR3 positive signals was  
347 observed within the nucleus of wild-type skeletal (**Figure 3-figure supplement 1D**) and cardiac  
348 (**Figure 3C**, upper panel) muscles, both expressing the lncRNA. Coherently with their pCharme-  
349 dependent formation, these condensates appeared more diffuse in tissues where the lncRNA is not  
350 expressed, as Charm<sup>KO</sup> muscles and WT spinal cords (**Figure 3C**, middle and lower panels; **Figure**  
351 **3-figure supplement 1D**). More accurate quantification of the MATR3 fluorescence distribution in  
352 the nucleus of Charm<sup>KO</sup> cardiomyocytes (Coefficient of variation (CV), **Figure 3-figure**  
353 **supplement 1F**), revealed a MATR3 IF pattern which was less discrete and more homogeneous in  
354 respect to WT.

**Figure 3**

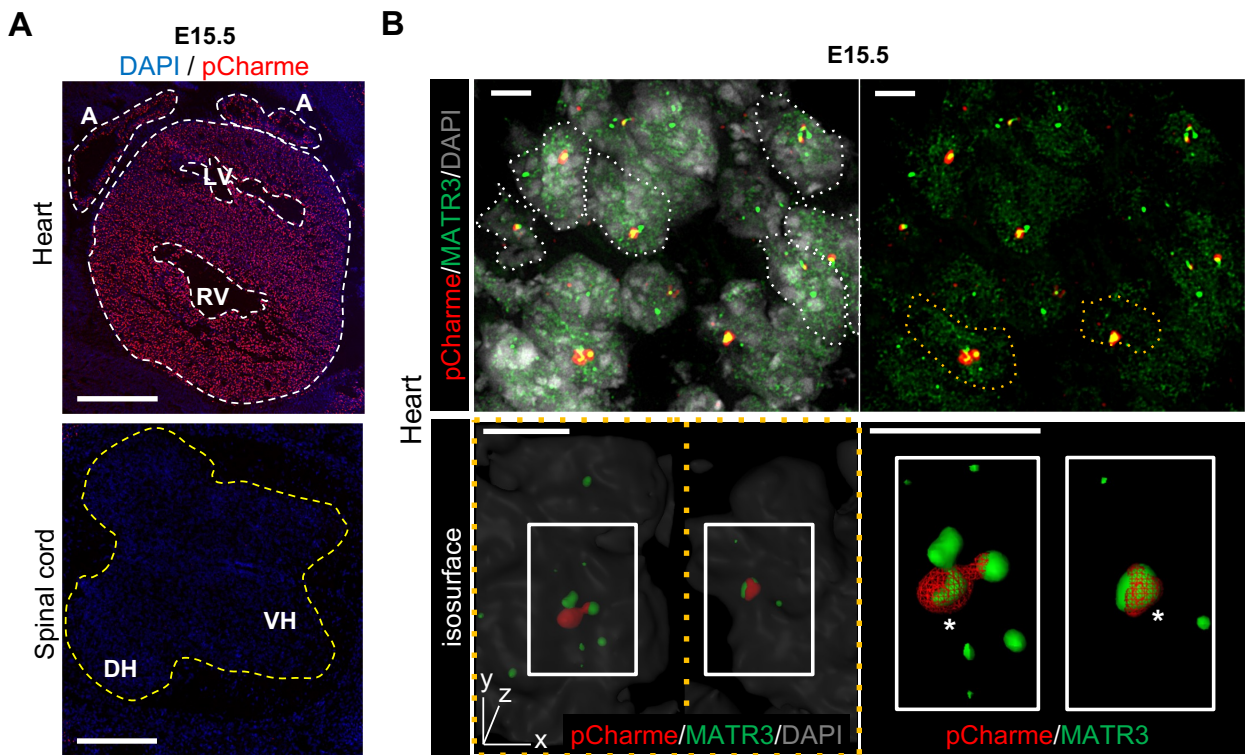

356 **Figure 3. In fetal cardiomyocytes pCharme nucleates the nuclear localization of MATR3**

357 **A)** RNA-FISH for pCharme (red) and DAPI staining (blue) in Charme<sup>WT</sup> cardiac and spinal cord  
358 from E15.5 tissue sections. Whole heart (white dashed lines), spinal cord (yellow dashed line). A:  
359 Atria; LV and RV: Left and Right ventricle; DH and VH: Dorsal and Ventral Horn. Scale bars, 500  
360  $\mu\text{m}$ .

361 **B)** Upper panel: RNA-FISH for pCharme (red) combined with immunofluorescence for MATR3  
362 (green) and DAPI staining (gray) in Charme<sup>WT</sup> from E15.5 cardiac sections. Dashed lines show the  
363 edge of nuclei. Lower panel: selected nuclei (yellow dashed lines in the upper panel) were enlarged  
364 and processed for isosurface reconstruction (left panel) and digital magnification (right panel).  
365 Overlapped signals are shown (asterisks). Scale bars, 5  $\mu\text{m}$ .

366 **C)** Upper panel: Representative images for MATR3 (green), TnnT2 (red) and DAPI (blue) stainings  
367 on Charme<sup>WT</sup> and Charme<sup>KO</sup> E15.5 cardiac sections. Lower panel: Representative images for for  
368 MATR3 (green), Map2 (red) and DAPI (blue) stainings on Charme<sup>WT</sup> and Charme<sup>KO</sup> E15.5 spinal  
369 cord sections. ROI (orange squares) were digitally enlarged on the right panels. Each image is  
370 representative of three individual biological replicates. Scale bars, 10  $\mu\text{m}$ .

371

372 The known ability of MATR3 to interact with both DNA and RNA and the high retention of pCharme  
373 on the chromatin may predict the presence of chromatin and/or specific transcripts within these  
374 MATR3-enriched condensates. In skeletal muscle cells, we have previously observed on a genome-  
375 wide scale, a global reduction of MATR3 chromatin binding in the absence of pCharme ([Desideri et](#)  
376 [al., 2020](#)). Nevertheless, the broad distribution of the protein over the genome made the identification  
377 of specific targets through MATR3-ChIP challenging. With the purpose to functionally characterise  
378 MATR3 interactome, here we applied a more straightforward MATR3 cross-linking  
379 immunoprecipitation (CLIP)-seq approach to fetal Charme<sup>WT</sup> and Charme<sup>KO</sup> hearts for the  
380 identification of MATR3 bound RNA targets (**Figure 4A**). Western blot analyses with antibodies

381 against MATR3 allowed to test the efficiency of protein recovery after the immunoprecipitation, in  
382 both the WT and KO conditions (**Figure 4-figure supplement 1A**). Subsequent analysis of the RNA,  
383 led to the identification of 951 cardiac-expressed transcripts significantly bound by MATR3 in the  
384 WT heart (log<sub>2</sub> Fold enrichment >2 and FDR value <0.05, **Figure 4-figure supplement 1B** and  
385 **Supplementary File 4**). Four candidates (*Cacna1c*, *Myo18B*, *Tbx20*, *Gata4*) were selected based on  
386 their FDR values (**Supplementary File 4**) for further validation by RT-qPCR, together with *Gapdh*  
387 as a negative control (**Figure 4-figure supplement 1C**).

388 In line with the binding propensities exhibited by MATR3 in other cell systems ([Uemura et al., 2017](#)),  
389 most of its enrichment was located within the introns of protein-coding mRNA precursors (**Figure**  
390 **4B**). Strikingly, even though the class of lncRNAs was poorly represented (**Figure 4B**, upper panel),  
391 we found pCharme at the top of the MATR3 interactors in Charme<sup>WT</sup> hearts (**Supplementary File**  
392 **4**). Quantification of the retrieved RNAs by RT-qPCR evidenced the specific enrichment of pCharme  
393 but not mCharme in the wild-type samples, which supports the distinctive binding of MATR3 to the  
394 nuclear isoform (**Figure 4-figure supplement 1D**). As expected, we observed a strong reduction of  
395 MATR3-CLIP signal on Charme RNA in Charme<sup>KO</sup> samples (**Figure 4C**, **Supplementary File 4**).

396 To gain further insight into the specificity of MATR3 binding, we proceeded with the analysis of the  
397 CLIP-identified peaks for the identification of RNA-binding proteins consensus sites, including  
398 MATR3. Motif enrichment analysis using 93 RNA-binding motifs catalogued by CISBP-RNA  
399 database ([Ray D, et al., 2013](#)) pinpointed the MATR3 consensus sequence (UUCUU, [Desideri et al.,](#)  
400 [2020](#)) among the most over-represented pyrimidine-enriched motifs (Evalue < 0.05) (**Figure 4D**).

401 When analysed in respect to the intensity of the CLIP signals, the MATR3 motif was positioned at  
402 the peak summit (+/- 50 nt) (**Figure 4E**), close to the strongest enrichment of MATR3, further  
403 confirming a direct and highly specific binding of the protein to these sites. Upon this quality  
404 assessment, we finally performed a GO enrichment analysis on the 882 protein-coding transcripts  
405 directly bound by MATR3 in the WT heart and found “Heart development” as the most significantly

406 enriched functional category (**Figure 4F**). Therefore, our results indicate the formation of MATR3-  
407 containing condensates inside the nucleus of cardiomyocytes which contain pCharne, as the most  
408 abundant lncRNA, and pre-mRNA encoding for important cardiac regulators.

**Figure 4**

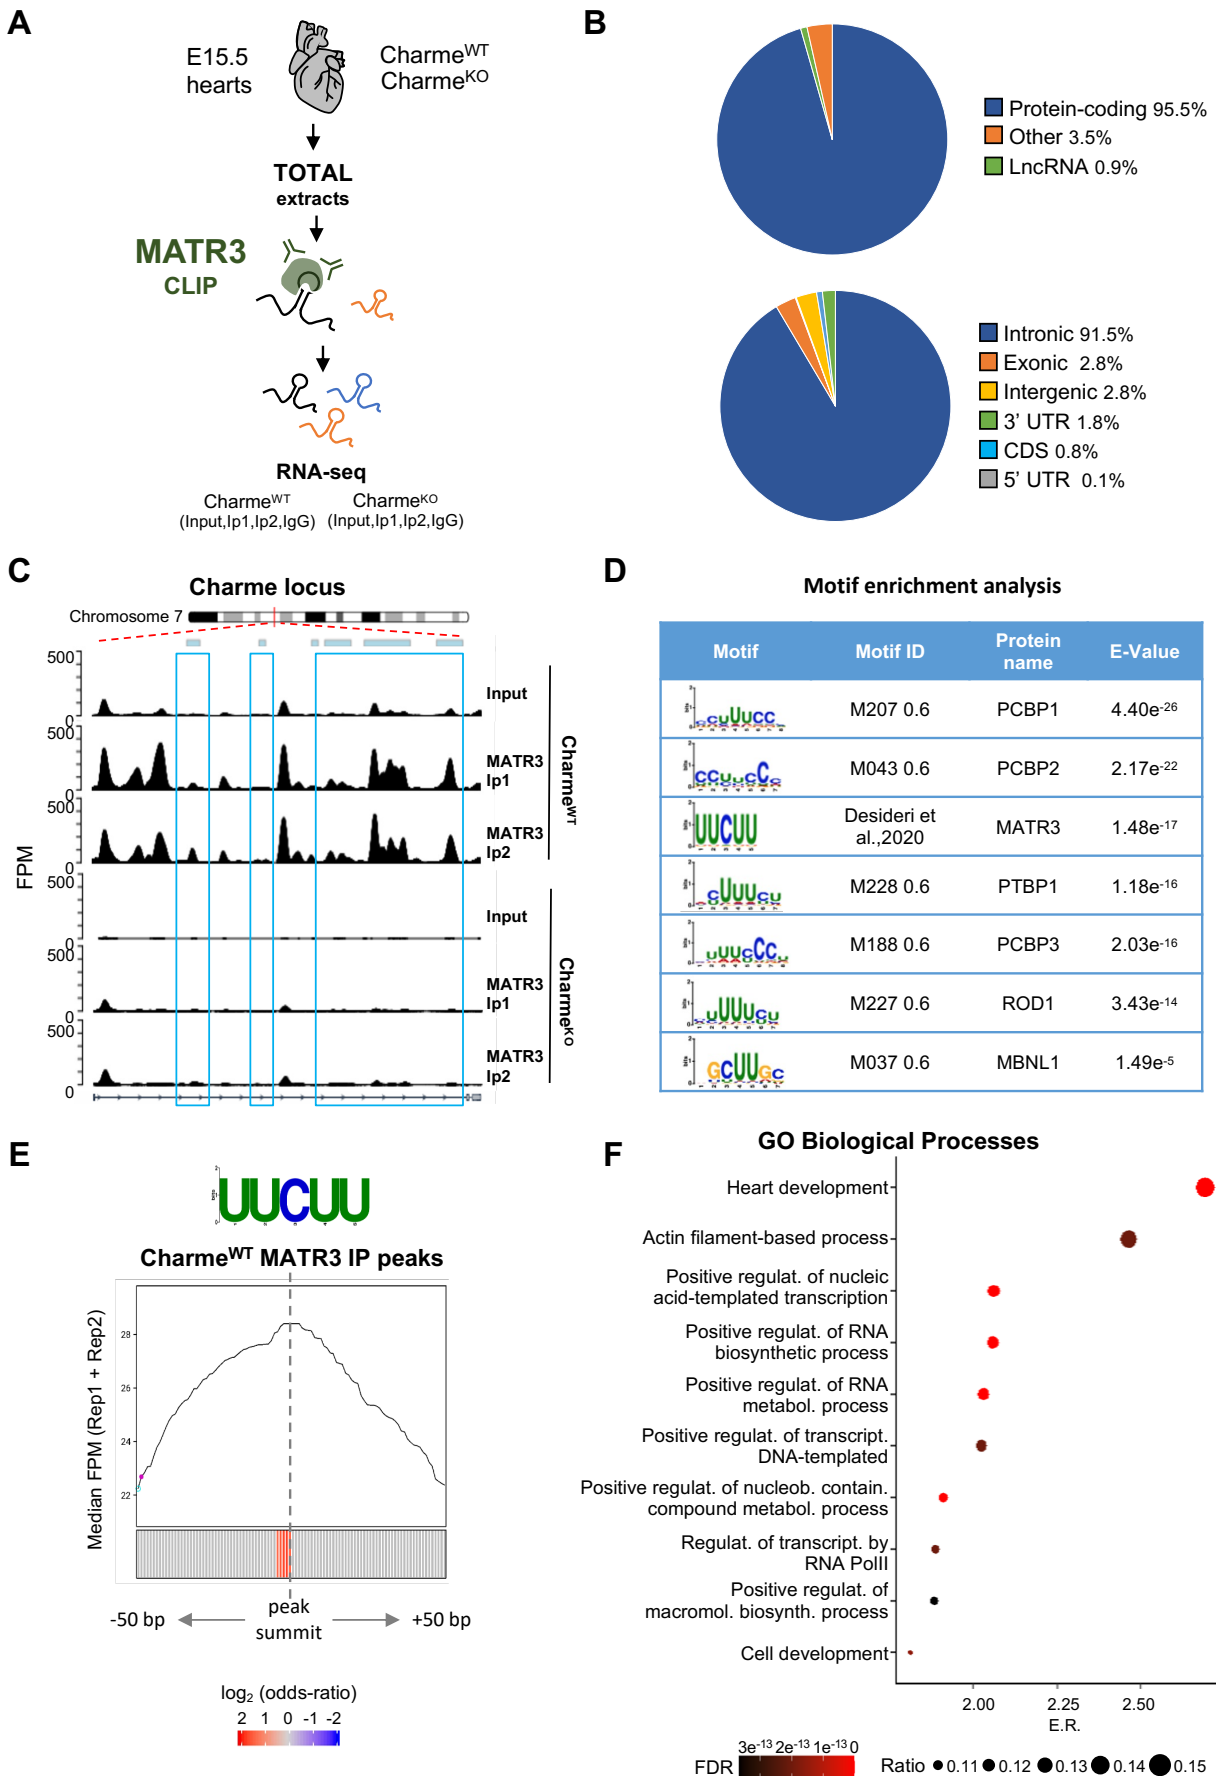

410

411 **Figure 4. MATR3/pCharme nuclear condensates contain key regulators of heart development**

412 **A)** Schematic representation of MATR3 CLIP-seq workflow from fetal (E15.5) Charme<sup>WT</sup> and  
413 Charme<sup>KO</sup> hearts. See **Materials and Methods** for details.

414 **B)** MATR3 CLIP-seq from fetal hearts. Upper panel: a pie-plot projection representing transcript  
415 biotypes of 951 identified MATR3 interacting RNAs. Peaks overlapping multiple transcripts were  
416 assigned with the following priority: protein coding, lncRNA and others. Lower panel: a pie-plot  
417 projection representing the location of MATR3 enriched peaks ( $\log_2$  Fold enrichment  $> 2$  and FDR  
418  $< 0.05$ ). Peaks overlapping multiple regions were assigned with the following priority: CDS, 3'UTR,  
419 5'UTR, exons, introns and intergenic. Percentages relative to each group are shown.

420 **C)** MATR3 CLIP-seq (Input, Ip1 and Ip2) normalized read coverage tracks (FPM) across pCharme  
421 from fetal hearts. Significant MATR3 peaks, displaying  $\log_2$  Fold enrichment  $> 2$  in both Ip1 and Ip2  
422 samples compared to Input, are demarcated by light-blue boxes.

423 Normalized read coverage tracks (FPM) from MATR3 CLIP-seq in Charme<sup>KO</sup> fetal hearts on Charme  
424 locus are also shown. Plot obtained using Gviz R package.

425 **D)** Motif enrichment analysis performed on MATR3 CLIP-seq peaks (Charme<sup>WT</sup>) with AME software  
426 using 93 RNA binding motifs from CISBP-RNA database. 7 consensus motifs resulted significantly  
427 over-represented (Evalue  $< 0.05$ ) among the MATR3 peaks, as compared to control regions. See  
428 **Material and Methods** for details.

429 **E)** Positional enrichment analysis of MATR3 motif in MATR3 CLIP-seq peaks (Charme<sup>WT</sup>). For  
430 each analyzed position close to peak summit, line plot displays the median CLIP-seq signal (FPM,  
431 IP1 + IP2), while heatmap displays the  $\log_2$  odds-ratio of UUCUU motif enrichment. Significant  
432 enrichments ( $p$ -value  $< 0.05$ ) are shown in red. See **Material and Methods** for details.

433 **F)** GO enriched categories obtained with WebGestalt (<http://www.webgestalt.org>) on protein-coding  
434 genes overlapping Charme<sup>WT</sup> MATR3 peaks. Dots indicate the top categories of biological processes



435 (description in y-axis) in decreasing order of Enrichment Ratio (E.R.= overlapped genes/expected  
436 genes, x-axis). Dot size (Ratio) represents the ratio between overlapped genes and GO categories size  
437 while dot color (FDR) represents significance. All the represented categories show an FDR<0.05.

438

439 **The pCharme/MATR3 interaction sustains developmental gene expression in fetal**  
440 **cardiomyocytes.**

441 On a transcriptome scale, we found that in the heart the expression of MATR3-bound RNAs was  
442 globally reduced by pCharme knockout (**Figure 5-figure supplement 1A**). Indeed, while MATR3  
443 targets were under-represented among transcripts whose expression was unaffected (invariant) or  
444 increased (up-regulated) by pCharme ablation, 12% of the downregulated DEGs (41 out of 340) were  
445 bound by MATR3 (**Figure 5A**). To note, these common targets were significantly enriched across  
446 the top-three GO classes, previously defined for Charme<sup>KO</sup> downregulated genes (**Figure 5B**). This  
447 evidence suggests that pCharme is needed to sustain the cardiac expression of MATR3 targets. To  
448 investigate the possible implication of the lncRNA for MATR3 binding to RNA, we proceeded with  
449 a differential binding (DB) analysis of MATR3 CLIP-seq datasets between Charme<sup>WT</sup> and Charme<sup>KO</sup>  
450 conditions (**Figure 5-figure supplement 1B,C**). Among the shared peaks, DB revealed that the main  
451 consequence of pCharme depletion was a significant decrease of MATR3 enrichment on the RNA  
452 (**Figure 5C, Loss**), while the increase of protein binding was observed on a lower fraction of peaks  
453 (**Figure 5C, Gain**). In line with the specificity for MATR3 binding, also in these sets of differentially  
454 bound regions, the MATR3 motif was positioned close to the summit of the peak (**Figure 5-figure**  
455 **supplement 1D**). By mapping these differentially bound regions to the MATR3 targets which are  
456 also responsive to pCharme ablation (DEGs), we found that while the gained peaks were equally  
457 distributed, the loss peaks were significantly enriched in a subset (20 out of 40, 50%) of down-  
458 regulated DEGs (**Figure 5D, upper panel**). Overall, these results suggest that cooperation between  
459 pCharme and MATR3 activities is needed for the expression of specific RNAs, which majority (13

460 out of 20) is known to play important roles in embryo development, anatomical structure  
461 morphogenesis and development of the circulatory system (**Figure 5D**, lower panel). Indeed, we  
462 found interesting candidates such as *Cacna1c*, *Notch3*, *Myo18B* and *Rbm20*, whose role in cardiac  
463 physiopathology was extensively studied ([Goonasekera et al., 2012](#); [Tao et al., 2017](#); [Ajima et al.,](#)  
464 [2008](#); [van den Hoogenhof et al., 2018](#)).

465 Finally, to univocally distinguish the contribution of pCharme and MATR3 on their expression, we  
466 tested the effect of MATR3 depletion on the abundance of these RNAs. We then purified cardiac  
467 primary cells from wild-type hearts for transfection with control (si-SCR) or MATR3 (si-*Matr3*)  
468 siRNAs (**Figure 5E**, left panel). RT-qPCR analysis revealed that 3 out of 4 tested genes exhibited a  
469 significant expression decrease upon MATR3 depletion (**Figure 5E**, right panel).

470 In sum, these data offer unprecedented knowledge on the RNA-binding propensities of MATR3 in  
471 the fetal heart and identify a subset of RNAs whose expression and MATR3 binding are influenced  
472 by pCharme. Our results demonstrate that in the developing heart RNA-rich MATR3-condensates  
473 form at the sites of pCharme transcription and control the expression of important regulators of  
474 embryo development, cardiac function, and morphogenesis. To the best of our knowledge, no  
475 previous research has given such an insight into the importance of specific lncRNA/RNA binding  
476 protein interactions occurring at the embryonal stages of mammalian heart development. As MATR3  
477 is involved in multiple nuclear processes, further studies will be necessary to address how the early  
478 interaction of the protein with pCharme impacts on the expression of specific RNAs, either at  
479 transcriptional or post-transcriptional stages.

**Figure 5**

**A**

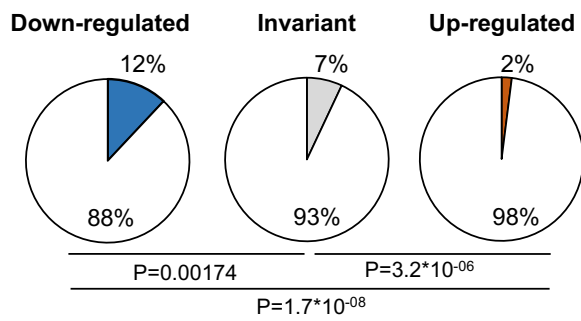

**B**

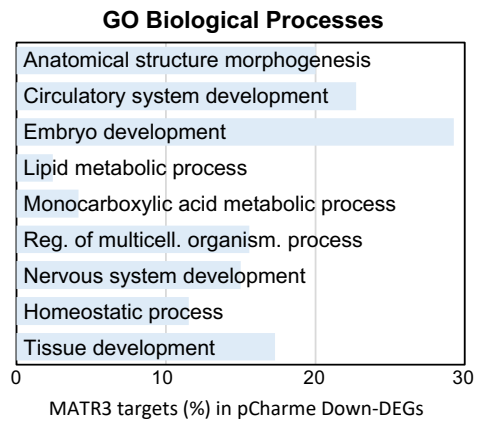

**C**

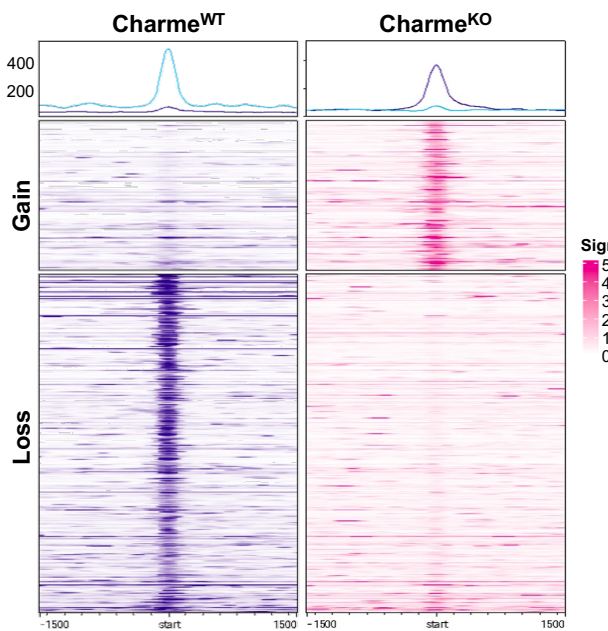

**D**

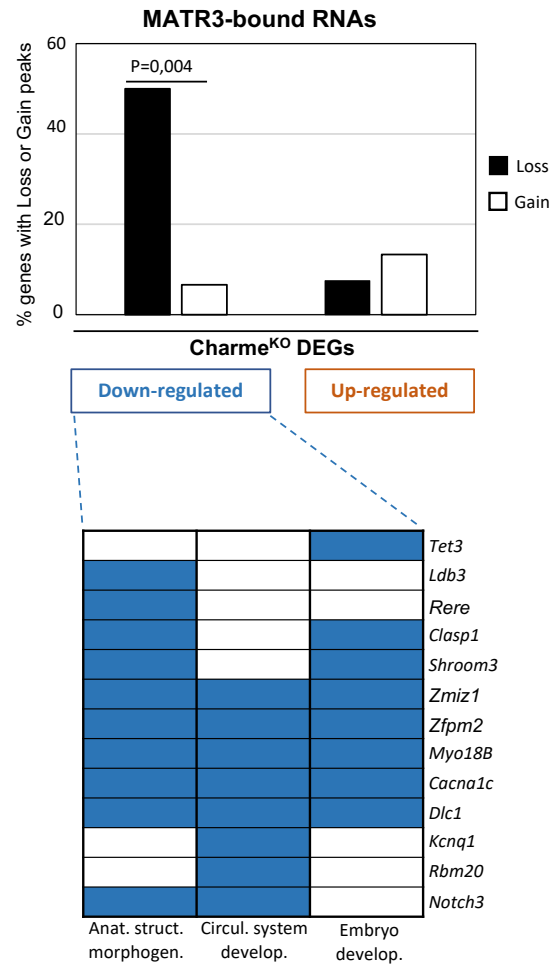

**E**

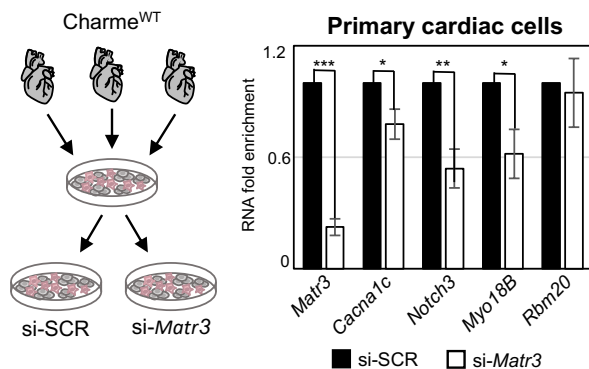

480

481 **Figure 5. The pCharme/MATR3 interaction in cardiomyocytes sustains developmental genes**

482 **expression**

483 **A)** Pie charts showing the percentage of MATR3 targets in Charme<sup>KO</sup> down-regulated, invariant or  
484 up-regulated DEGs. Significance of enrichment or depletion was assessed with two-sided Fisher's  
485 Exact test, shown below.

486 **B)** MATR3 targets (%) in the GO categories enriching Charme<sup>KO</sup> down-regulated DEGs (Down-  
487 DEGs) (see also **Figure 2A**).

488 **C)** Profile Heatmaps of differential MATR3 CLIP-seq peaks (Charme<sup>WT</sup> vs Charme<sup>KO</sup>). Normalized  
489 mean read counts of both IP samples are shown only for significant (FDR < 0.05) «Gain» and «Loss»  
490 peaks.

491 **D)** Upper panel: histogram showing the distribution (%) of «Gain» and «Loss» MATR3 peaks in  
492 pCharme DEGs. Significance of enrichment was assessed with two-sided Fisher's Exact test. Lower  
493 panel: distribution of the subset (13 out of 20) of Down-DEGs with Loss peaks in the first three GO  
494 categories identified for down-regulated genes (see also Figure 2A).

495 **E)** Left panel: Schematic representation of primary cells extraction from Charme<sup>WT</sup> hearts. Once  
496 isolated, cells were plated and transfected with the specific siRNA (si-*Matr3*) or control siRNA (si-  
497 SCR). See Materials and Methods for details. Right panel: RT-qPCR quantification of *Matr3*,  
498 *Cacna1c*, *Notch3*, *Myo18B* and *Rbm20* RNA levels in primary cardiac cells treated with si-SCR or  
499 si-*Matr3*. Data were normalized to *Gapdh* mRNA and represent mean ± SEM of 4 independent  
500 experiments. Data information: \*p < 0.05; \*\*p < 0.01; \*\*\*p < 0.001, unpaired Student's t test.

501

## 502 **DISCUSSION**

503 In living organisms, the dynamic assembly and disassembly of distinct RNA-rich molecular  
504 condensates influences several aspects of gene expression and disease ([Rodén et al., 2021](#)). The  
505 engagement of specific lncRNAs can enhance the biochemical versatility of these condensates  
506 because of the extraordinary tissue-specificity, structural flexibility and the propensity of this class  
507 of RNAs to gather macromolecules ([Buonaiuto et al., 2021](#)). Furthermore, the maintenance of specific

508 lncRNAs on the chromatin combined with their scaffolding activity for RNA and proteins can  
509 cunningly seed high-local concentrations of molecules to specific loci ([Bhat et al., 2021](#); [Ribeiro et  
510 al., 2018](#)). The occurrence of alternative RNA processing events eventually leads to the formation of  
511 diverse lncRNA isoforms, thus refining the biochemical properties and the binding affinities of these  
512 ncRNAs. This suggestive model perfectly fits with pCharme and provides mechanistic insights into  
513 the physiologic importance of this lncRNA in muscle. In fact, of the two different splicing isoforms  
514 produced by the Charme locus, only the unspliced and nuclear pCharme isoform was found to play  
515 an epigenetic, architectural function in skeletal myogenesis under physiological circumstances.

516 Here, we took advantage of our Charme<sup>KO</sup> mouse model to extend the characterization of the lncRNA  
517 in embryogenesis. We show that the temporal and cell-type specific expression of pCharme is critical  
518 for the activation of pro-differentiation cardiac genes during development. Mechanistically, we  
519 provide evidence that this activity relies on the formation of pCharme-dependent RNA-rich  
520 condensates acting as chromatin hubs for MATR3, a nuclear matrix DNA/RNA-binding protein  
521 highly abundant in the fetal heart and source, upon mutation, of congenital defects ([Quintero-Rivera  
522 et al., 2015](#)). MATR3 ability to bind RNA can lead to the formation of dynamic shell-like nuclear  
523 condensates, whose composition depends on the integrity of the two RNA Recognition Motifs  
524 (RRM1 and 2) ([Malik et al., 2018](#), [Sprunger et al., 2022](#)). Evidence supporting the physiological  
525 relevance of RNA-MATR3 interplay is emerging in both neural and muscle pathologies ([Ramesh Net  
526 al., 2020](#); [Senderek J, et al. 2009](#); [Feit H, et al 1998](#)). In skeletal muscle, we previously showed that  
527 the presence of an intronic element bearing ~100 MATR3 binding sites inside pCharme, is needed  
528 for MATR3 nuclear localization ([Desideri et al., 2020](#)). Here, we add an important dowel into the  
529 functional characterization of pCharme and give a developmental meaning to its interaction with  
530 MATR3 (**Figure 6**). We show that the absence of the lncRNA in cardiomyocytes alters the MATR3  
531 nuclear distribution and its binding to specific RNAs, with a consequent mis-regulation of their  
532 developmental expression. Among them, we found a subset of shared pCharme/MATR3 targets,

533 whose role in cardiac physiopathology was extensively studied, such as *Smad3*, *Notch3* and the  
534 myogenic components *Cacna1c* and *Myosin-18B* ([Goonasekera et al., 2012](#); [Tao et al., 2017](#); [Ajima  
535 et al., 2008](#); [van den Hoogenhof et al., 2018](#)).

**Figure 6**

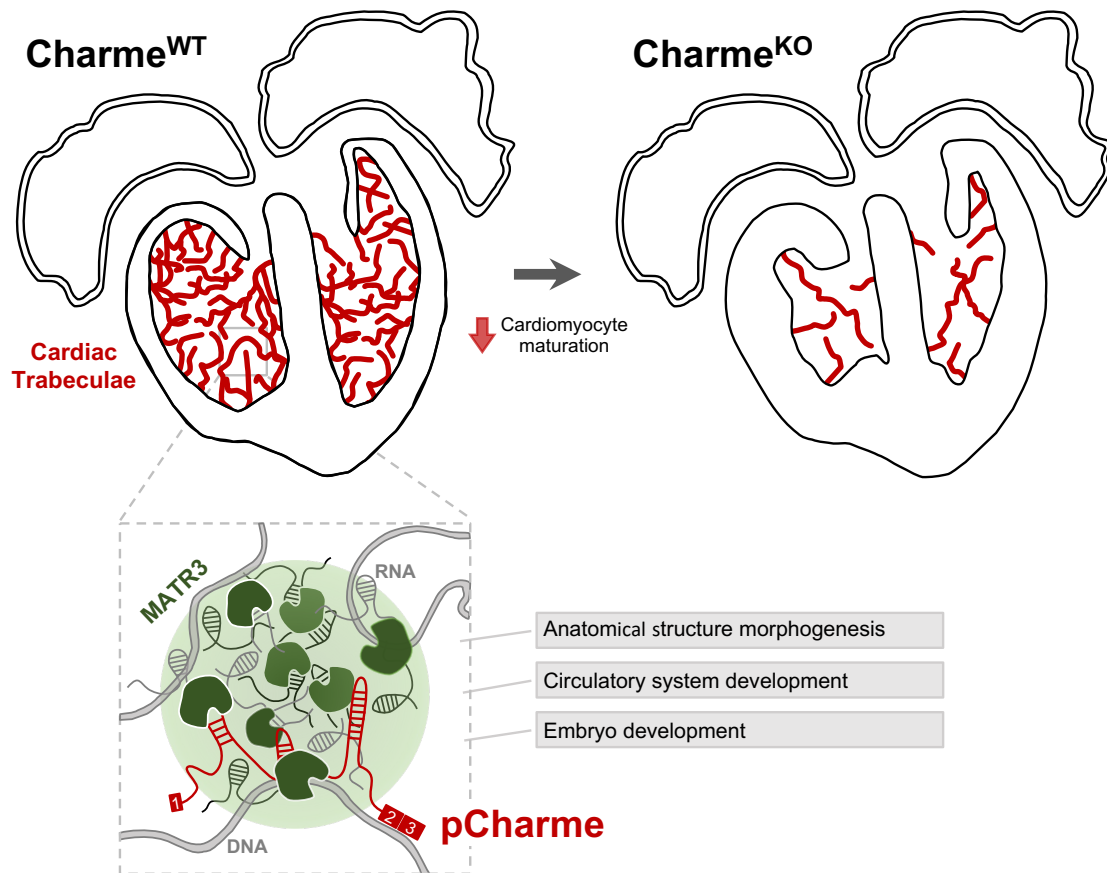

536

537 **Figure 6. Proposed model for pCharme functions during heart development.**

538 At developmental stages ( $\text{Charme}^{\text{WT}}$ ), pCharme is required for the expression of genes involved in  
539 cardiomyocyte maturation. This activity is accompanied by the formation of nuclear condensates,  
540 through the interaction with the RNA-binding protein MATR3, which enrich transcripts involved in  
541 cardiac development. pCharme absence ( $\text{Charme}^{\text{KO}}$ ) leads to the reduction of cardiac trabeculae  
542 during development and to the remodelling of heart morphology.

543

544 It is interesting to note that, in the cardiac context, the reactivation of fetal-specific RNA-binding  
545 proteins, including MATR3, was recently found to drive transcriptome-wide switches through the

546 regulation of early steps of RNA transcription and processing ([D'Antonio et al., 2022](#)). Along this  
547 view, the pCharme-dependent regulation of MATR3 binding in developing cardiomyocytes  
548 emphasises the need of cell-type specific lncRNAs for ruling the protein activities to specific RNAs,  
549 in a tissue-distinctive and spatio-temporal manner. As the impairment in the nuclear distribution of  
550 MATR3 can exert adverse effects in diverse tissues, our study may provide a more inclusive  
551 viewpoint on myopathies as well as other neuromuscular disorders where alteration in muscle  
552 development involves not only the myogenic lineage but also the interaction of the myogenic cells  
553 with the surrounding tissues.

554 These results also underlie the importance of studying cardiomyogenesis in animal models, which  
555 allow a better appreciation of the balance between the proliferation and maturation processes in  
556 cardiomyocytes and, importantly, the study of the cardiac functions in adulthood. In our case, adult  
557 Charme<sup>KO</sup> mice develop a significant reduction of systolic function with initial signs of cardiac  
558 dilation, which denotes an early phase of cardiomyopathy. The results are supported by recently  
559 published data suggesting that the transition of cardiomyocytes toward an immature phenotype *in*  
560 *vivo* is associated with the development of dilated cardiomyopathy ([Ikeda et al., 2019](#)).

561 Recent cardiovascular studies have uncovered essential roles for lncRNAs in cardiac development  
562 and disease ([Scheuermann and Boyer, 2013](#); [Anderson et al., 2016](#); [Ritter et al., 2019](#)). However, a  
563 still unmet need is to disentangle non-canonical lncRNA-mediated mechanisms of action to gain  
564 insight into more successful diagnosis and classification of patient subpopulation but also to use them  
565 as possible diagnostic biomarkers or therapeutic targets ([Buonaiuto et al., 2021](#)). Future efforts will  
566 be devoted to clarifying the implication of the syntenic pCharme transcript in those human  
567 cardiomyopathies where pathological remodelling of the cardiac muscle occurs.

568

## 569 **MATERIALS AND METHODS**

### 570 **Ethics Statement and animal procedures**

571 C57BI/6J mice were used in this work. The Charm<sup>KO</sup> animals were previously derived through the  
572 insertion of a PolyA signal in the Charm locus, as detailed in (Ballarino et al., 2018). All procedures  
573 involving laboratory animals were performed according to the institutional and national guidelines  
574 and legislations of Italy and according to the guidelines of Good Laboratory Practice (GLP). All  
575 experiments were approved by the Institutional Animal Use and Care Committee and carried out in  
576 accordance with the law (Protocol number 82945.56). All animals were kept in a temperature of 22°C  
577 ± 3°C with a humidity between 50% and 60%, in animal cages with at least 5 animals.

578

### 579 **Isolation, transfection, and subcellular fractionation of mouse primary heart cells**

580 For primary heart cells isolation and transfection, 5 to 10 postnatal (PN3) hearts for each replicate  
581 (n=4) were pooled, harvested and kept at 37°C in culture medium (FBS 10%, 1X Non-Essential  
582 aminoacids, 1x PenStrep and DMEM high glucose). Hearts were mashed with pestles for 2 min and  
583 cell isolation performed according to manufacturer's instructions (Neonatal Heart Dissociation Kit,  
584 Miltenyi Biotec). Cell suspension was centrifuged for 5 min at 600 x g and cells were resuspended in  
585 cell culture medium and plated in 22.1 mm plates. 1,5 million cells were transfected 48 hr later with  
586 75 mM si-SCR or si-MATR3 in 3 µl/ml of Lipofectamine RNAiMAX (Thermo Fisher Scientific) and  
587 100 µl/ml of Opti-MEM (Thermo Fisher Scientific), according to manufacturer's specifications. Total  
588 RNA was collected 48 hr after transfection. See **Supplementary File 5** for siRNA sequences.  
589 Subcellular fractionation of primary embryonal (E15.5) cardiac cells was performed using the Paris  
590 Kit (Thermo Fisher Scientific, cat#AM1921), according to the manufacturer's instructions.

591

### 592 **Whole-mount *in situ* hybridization**

593 Embryos were fixed overnight in 4% paraformaldehyde (PFA) in phosphate-buffered saline (PBS)  
594 plus 0.1% Tween® 20 (PBT) at 4°C, dehydrated through a series of methanol/PBT solutions (25%,  
595 50%, 75% and 100% methanol), and stored at -20°C until hybridization. Fixed embryos were



596 rehydrated and rinsed twice in PBT. At this point, embryos were either digested with DNase and/or  
597 RNase or kept in PBT. All embryos were bleached in 6% hydrogen peroxide in PBT for 1h. Embryos  
598 were then rinsed 3 times in PBT for 5 min, digested with proteinase K (10 µg/ml in PBT) for 5 min  
599 at room temperature, washed once in 2 mg/ml glycine in PBT and twice in PBT for 5 min each, and  
600 post-fixed in 4% PFA/0.2% glutaraldehyde in PBT for 20 min at room temperature. Embryos were  
601 subsequently rinsed twice in PBT for 5 min and pre-hybridized at 70°C in hybridization solution  
602 (50% Formamide, 5x SSC, pH 5, 0.1% Tween 20, 50 µg/ml heparin, 50 µg/ml Torula RNA, 50 µg/ml  
603 salmon sperm DNA) for 2h. Embryos were then incubated overnight at 70°C in hybridization solution  
604 containing 500 ng/ml of denatured riboprobe. Riboprobes were generated by *in vitro* transcription in  
605 the presence of Digoxigenin-UTP (Roche Diagnostics). Antisense and sense Charme probes, used as  
606 specificity controls, were synthesised from linearized pBluescript-Charme\_Ex2/3 plasmid. On the  
607 second day, embryos were washed twice in 50% formamide/4x SSC, pH 5/1% SDS and twice in 50%  
608 formamide/2x SSC, pH 5 for 30 min each at 55°C. Embryos were then rinsed three times for 5 min  
609 in MABT (100 mM maleic acid, 150 mM NaCl, pH 7.5, 0.1% Tween), blocked for 2 h at room  
610 temperature in 10% goat serum in MABT, and incubated overnight at 4°C in 1% goat serum in MABT  
611 with 1:5000 alkaline phosphatase-coupled anti-Digoxigenin antibody (Roche Diagnostics). On the  
612 third day, embryos were washed in MABT twice for 5 min and 5 more times for 1 h each. Embryos  
613 were then rinsed twice in NTMT (100 mM NaCl, 100 mM Tris-HCl, pH 9.5, 50 mM MgCl<sub>2</sub>, 0.1%  
614 Tween) for 15 min each, followed by the staining reaction in BM Purple (Roche Diagnostics) in the  
615 dark for 30 min to 12 h. Stained embryos were fixed overnight in 4% PFA in PBT, stored in PBT and  
616 photographed under a stereomicroscope.

617

### 618 **Cryo-section *in situ* hybridization**

619 Embryos were dissected in cold PBS (pH 7.4) and fixed in 4% w/v PFA for 24 h at 4°C. Following  
620 fixation, the embryos were cryoprotected either in 30% w/v sucrose in PBS (for PFA-fixed embryos)

621 or in 30% w/v sucrose in 0.1 M Tris pH 7.5 (for Z7-fixed embryos), embedded in tissue freezing  
622 medium (Leica Microsystems), sectioned at 12  $\mu$ m using a cryostat (Leica 1900UV) and transferred  
623 to superfrost plus (ROTH) slides. The sections were air-dried for at least 30 min and stored at  $-80^{\circ}\text{C}$   
624 until later use. For chromogenic detection, sections were post-fixed in 4% w/v PFA in PBS for 10  
625 min or in Z7, washed three times in PBS (or twice in 0.1 M Tris-HCl pH:7, 0.05 M NaCl and once  
626 in PBS for Z7) and incubated in acetylating solution (1.3% v/v triethanolamine, 0.03 N HCl, 0.25%  
627 v/v acetic anhydrite) for 10 min. Sections were then washed in PBS, incubated in 1% v/v Triton-X-  
628 100 in PBS for 30 min and washed three times in PBS. Prehybridization was performed for 4-6 h in  
629 buffer H (50% v/v formamide, 5 $\times$  SSC (0.75 M NaCl, 0.075 M sodium citrate), 5 $\times$  Denhardt's (0.1%  
630 bovine serum albumin, 0.1% and 0.1% Polyvinylpyrrolidone), 250  $\mu$ g/ml yeast RNA and 500  $\mu$ g/ml  
631 salmon sperm DNA). Hybridization was performed in a humidified chamber for 16 h at  $65^{\circ}\text{C}$  in H  
632 buffer with DIG-labeled probe added (400  $\mu$ g/ml). The probes were generated by *in vitro* transcription  
633 in the presence of Digoxigenin-UTP (Roche Diagnostics). Following hybridization, sections were  
634 sequentially washed in 5 $\times$  SSC (5 min,  $65^{\circ}\text{C}$ ), 0.2 $\times$  SSC (1 h,  $65^{\circ}\text{C}$ ), 0.2 $\times$  SSC (5 min, RT). Then  
635 they were incubated in AB buffer (0.1 M Tris pH 7.5, 0.15 M NaCl) for 5 min, and in blocking  
636 solution (10% v/v Fetal Calf Serum in AB) for 1–2 h at RT. Antibody incubation was performed for  
637 16 h at  $4^{\circ}\text{C}$  in AB buffer supplemented with 1% v/v Fetal Calf Serum and anti-DIG antibody coupled  
638 to alkaline phosphatase (1:5000 dilution; Roche). Sections were then washed thoroughly in AB and  
639 equilibrated in alkaline phosphatase buffer (AP - 0.1 M Tris-HCl pH: 9.5, 0.1 M NaCl, 0.05 M  
640  $\text{MgCl}_2$ ) for 5 min. Alkaline phosphatase activity was detected in the dark in AP buffer supplemented  
641 with 45 mg/ml 4-nitrobluetetrazolium chloride (NBT, Roche) and 35 mg/ml 5-bromo-4-chloro-3-  
642 indolyl-phosphate (BCIP, Roche). The reaction was stopped with PBS and the sections were mounted  
643 in Glycergel (Dako). Sections were analysed and photographed under a stereomicroscope.  
644 Fluorescent detection was performed via Basescope<sup>TM</sup> assay (Advanced Cell Diagnostics, Bio-  
645 Techne) as previously described in [D'Ambra et al., 2021](#), with little modifications according to the

646 manufacturer's instructions for tissue processing. Probes used to specifically detect pCharme RNA  
647 (ref. 1136321-C1) were custom produced by Advanced Cell Diagnostics and designed to specifically  
648 target the intronic sequence in order to detect the unspliced transcripts.

#### 649 650 **Preparation of probe templates for *in-situ* hybridization experiments**

651 pCharme exon 2 and exon 3 were PCR-amplified from cDNA extracted from myotubes using  
652 Charme\_Up-BamHI and Charme\_Down-EcoRI primers (**Supplementary File 5**). PCR products  
653 were cloned into pBluescript ks(-) upon BamHI and EcoRI (Thermo Fisher Scientific) enzymatic  
654 restriction.

#### 655 656 **Histology**

657 All hearts were fixed in 4% formaldehyde, embedded in OCT, and cut into 7  $\mu\text{m}$  sections. After  
658 washing with PBS 3 times for 5 min, the sections were stained for 7 min with eosin (Merk,  
659 cat#109844). Subsequently, slides were washed 3 times with PBS and then incubated with  
660 haematoxylin (Merk, 105175) for 90 s.

#### 661 662 **Immunohistochemistry**

663 Fresh E15.5 and PN tissues were embedded in OCT and then frozen in isopentane pre-chilled in liquid  
664 nitrogen. Cryo-sections (10  $\mu\text{m}$  of thickness) were fixed in PFA 4% at 4°C for 20 min prior staining  
665 with primary antibodies, as previously described. Antibodies and dilutions are reported in  
666 **Supplementary File 5**. DAPI, KI-67, NPPA, TNNT2 and *G. simplicifolia* lectin immunofluorescence  
667 signals (Figure 2H; Figure 2-figure supplement 1D,E,H) were acquired with Carl Zeiss Microscopy  
668 GmbH Imager A2 equipped with AxioCam503 color camera. MATR3, TNNT2 and MAP2 signals  
669 (Figure 3C; Figure 3-figure supplement 1D,E) were acquired as Z stacks (200 nm path) by inverted  
670 confocal Olympus IX73 microscope equipped with a Crestoptics X-LIGHT V3 spinning disk system

671 and a Prime BSI Express Scientific CMOS camera. Images were acquired as 16bit 2048x2048 pixel  
672 file by using 100X NA 1.40 and 60X NA 1.35 oil (UPLANS Apo) objectives and were collected with  
673 the MetaMorph software (Molecular Devices). The average number of KI-67 positive nuclei from  
674 n=4 Charne<sup>WT</sup> and Charne<sup>KO</sup> neonatal cardiac sections was determined by dividing the number of  
675 immunolabeled nuclei over the total number of nuclei in each microscope field. For each replicate,  
676 from 4 to 18 fields were analysed with ImageJ Software ([Schneider C.A. et al., 2012](#)). NPPA and G.  
677 simplicifolia lectins sub-tissutal staining (Figure 2H; Figure 2-figure supplement 1H) was analysed  
678 using ImageJ software ([Schneider C.A. et al., 2012](#)) and according to Fukuda et al., 2013, with little  
679 modifications. Briefly, we quantified the ratio between the area covered by the NPPA/lectins signal  
680 immunofluorescence signals and the total area of the left ventricle. To calculate the area, the left  
681 ventricle was selected with the line selection tool. A threshold was then applied to the selected region  
682 to measure the area covered by the signal. Plot in Fig. 2F represents the percentage of area covered  
683 by the NPPA/lectins signal divided by the area of the left ventricle.

684 Quantification of MATR3 puncta in Figure 3C was performed using ImageJ software ([Schneider C.A.  
685 et al., 2012](#)) according to ([Higaki T. et al., 2020](#)), with little modifications. Briefly, a “mask” from  
686 binarized images was created and used to measure the intensity of MATR3 fluorescence inside the  
687 nuclei and the standard deviation (SD). MATR3 distribution was evaluated by Coefficient Variation  
688 (CV) defined as  $CV = \text{mean SD} / \text{mean MATR3 intensity}$ . A higher CV value indicates a higher spatial  
689 variability of fluorescence distribution (punctate staining); conversely, a lower CV value corresponds  
690 to a higher uniformity of fluorescence distribution (diffuse staining). Statistical analysis was  
691 performed using t-test, and the differences between means were considered significant at  $P \leq 0.05$ .

692

### 693 **RNA extraction and RT-qPCR analysis**

694 Total RNA from cultured cells and tissues was isolated using TRI Reagent (Zymo Research),  
695 extracted with Direct-zol<sup>TM</sup> RNA MiniPrep (Zymo Research), treated with DNase (Zymo Research),

696 retrotranscribed using PrimeScript Reagent Kit (Takara) and amplified by RT-qPCR using PowerUp  
697 SYBR-Green MasterMix (Thermo Fisher Scientific), as described in [Desideri et al., 2020](#). See  
698 Supplementary File 5 for oligos details.

699

## 700 **RNA-Seq Analysis**

701 To reduce biological variability, Charm<sup>WT</sup> and Charm<sup>KO</sup> neonatal littermates (PN2) were sacrificed  
702 and hearts from the corresponding genotypes pooled together before RNA extraction (3 Charm<sup>WT</sup>  
703 pools, 9 hearts each, 2 Charm<sup>KO</sup> pools, 3 hearts each). Validation analyses were performed on 2  
704 additional Charm<sup>WT</sup> pools (6 hearts each) and 2 Charm<sup>KO</sup> pools (4 hearts each). Principal  
705 component analysis (PCA) conducted on the RNA-seq data, revealed that the two groups were  
706 evidently distinguished for the first principal component (**Figure 2-figure supplement 1A**). Illumina  
707 Stranded mRNA Prep was used to prepare cDNA libraries for RNA-Seq that was performed on an  
708 Illumina Novaseq 6000 Sequencing system at IIT-Istituto Italiano di Tecnologia (Genova, Italy).  
709 RNA-seq experiment produced an average of 26 million 150 nucleotide long paired-end reads per  
710 sample. Dark cycles in sequencing from Novaseq 6000 machines can lead to a high quality stretches  
711 of Guaninines artifacts; in order to remove these artifacts, low quality bases and N stretches from  
712 reads were removed by Cutadapt software using “-u -U”, “--trim-n” and “--nextseq-trim=20”  
713 parameters ([Martin et al., 2011](#)). Illumina adapter remotion were performed using Trimmomatic  
714 software ([Bolger et al., 2014](#)). Reads whose length after trimming was <35 nt were discarded. Reads  
715 were aligned to GRCm38 assembly using STAR aligner software ([Dobin et al., 2013](#)). Gene loci  
716 fragment quantification **was** performed on Ensemble (release 87) gene annotation gtf using STAR –  
717 quantMode GeneCounts parameter. Read counts of “reverse” configuration files were combined into  
718 a count matrix file, which was given as input to edgeR ([Robinson et al., 2010](#)) R package for  
719 differential expression analysis, after removing genes with less than 10 counts in at least two samples.  
720 Samples were normalized using TMM. Model fitting and testing were performed using the glmFIT

721 and glmLRT functions. Gene-level FPKM values were calculated using rpkms function from the  
722 edgeR package. FDR cutoff for selecting significant differentially expressed genes was set to 0.1.  
723 Genes with less than 1 average FPKM in both conditions were filtered out. Heatmap of differentially  
724 expressed genes was generated using heatmap3 R package ([Zhao et al., 2014](#)) from log2 transformed  
725 FPKM values. Volcano plots were generated using “Enhanced Volcano” R package  
726 ([bioconductor.org/packages/release/bioc/vignettes/EnhancedVolcano/inst/doc/EnhancedVolcano](http://bioconductor.org/packages/release/bioc/vignettes/EnhancedVolcano/inst/doc/EnhancedVolcano)).  
727 Gene Ontology analyses were performed on up-regulated and down-regulated protein coding genes  
728 using WebGestalt R package ([Liao Y et al., 2019](#)) applying Weighted Set Cover dimensionality  
729 reduction.

730

### 731 **Cross-linking immunoprecipitation (CLIP) assay**

732 A total of 60 Charme<sup>WT</sup> and 56 Charme<sup>KO</sup> E15.5 embryonal hearts were collected, divided in two  
733 distinct biological replicates and pestled for 2 min in PBS, 1x PIC and 1x PMSF. For each replicate,  
734 the solution was filtered in a 70 µm strainer and the isolated cells were plated and UV-crosslinked  
735 (4,000 µJ) in a Spectrolinker UV Crosslinker (Spectronics corporation). Upon harvesting, cells were  
736 centrifuged 5 min at 600 x g and pellets resuspended in NP40 lysis buffer (50 mM HEPES pH 7.5,  
737 150 mM KCl, 2 mM EDTA, 1 mM NaF, 0.5% (v/v) NP40, 0.5 mM DTT, 1x PIC,), incubated on ice  
738 for 15 min and sonicated at low intensity six times with Bioruptor<sup>®</sup> Plus sonication device to ensure  
739 nuclear membrane lysis. Lysate was diluted to a final concentration of 1 mg/ml. 30 µl of Dynabeads  
740 Protein G magnetic particles (Thermo Fisher Scientific) per ml of total lysate were washed twice with  
741 1 mL of PBS-Tween (0.02%), resuspended with 5 µg of MATR3 (Supplementary File 5) or IgG  
742 antibodies (Immunoreagents Inc.) and incubated for 2 h at room temperature. Beads were then washed  
743 twice with 1 mL of PBS-T and incubated with total extract overnight at 4°C. Beads were washed  
744 three times with 1 mL of HighSalt NP40 wash buffer (50 mM HEPES-KOH, pH 7.5, 500 mM KCl,  
745 0.05% (v/v) NP40, 0.5 mM DTT, 1x PIC) and resuspended in 100 µl of NP40 lysis buffer. For RNA

746 sequencing, 75  $\mu$ l of the sample were treated for 30 min at 50°C with 1.2 mg/ml Proteinase K (Roche)  
747 in Proteinase K Buffer (100 mM Tris-HCl, pH 7.5, 150mM NaCl, 12.5 mM EDTA, 2% (w/v) SDS).  
748 For Western Blot analysis, 25  $\mu$ l of the sample were heated at 95°C for 5 min and resuspended in 4x  
749 Laemmli sample buffer (BioRad)/50 mM DTT before SDS-PAGE.

750

### 751 **MATR3 CLIP-seq analysis**

752 Trio RNA-Seq (Tecan Genomics, Redwood City, CA) has been used for library preparation following  
753 the manufacturer's instructions. The sequencing reactions were performed on an Illumina Novaseq  
754 6000 Sequencing system at IGA Technology services. CLIP-sequencing reactions produced an  
755 average of 25 million 150 nucleotide long paired-end reads per sample Adaptor sequences and poor  
756 quality bases were removed from raw reads using a combination of Trimmomatic version 0.39  
757 ([Bolger et al., 2014](#)) and Cutadapt version 3.2 ([Martin et al., 2011](#)) softwares. Reads whose length  
758 after trimming was <35 nt were discarded. Alignment to mouse GRCm38 genome and Ensembl  
759 87 transcriptome was performed using STAR aligner version 2.7.7a ([Dobin et al., 2013](#)). Alignment  
760 files were further processed by collapsing PCR duplicates using the MarkDuplicates tool included in  
761 the Picard suite version 2.24.1 (<http://broadinstitute.github.io/picard/>) and discarding the multi-  
762 mapped reads using BamTools version 2.5.1 ([Barnett et al., 2011](#)). Properly paired reads were  
763 extracted using SAMtools version 1.7 ([Li et al., 2009](#)). GRCm38 genome was divided into 200 bp  
764 long non-overlapping bins using the BEDtools makewindows tool ([Quinlan et al., 2010](#)). Properly  
765 paired fragments falling in each bin were counted using the BEDtools intersect tool filtering out reads  
766 mapping to rRNAs, tRNAs or mitochondrial genome in order to create sample-specific count files.  
767 These files were given as input to Piranha version 1.2.1 ([Uren et al., 2012](#)) using  $-x -s -u 0$  parameters  
768 to call significant bins for MATR3 Ip and IgG samples. BEDtools intersect was used to assign each  
769 genomic bin to genes using Ensembl 87 annotation. For each gene the bin signal distribution in the  
770 input sample was calculated after normalization of fragment counts by the total number of mapping

771 fragments. Ip significant bins presenting normalized signals lower than the upper-quartile value of  
772 the related gene distribution were filtered out. After this filter, significant bins belonging to Ip samples  
773 were merged using BEDTools merge tool. The number of fragments overlapping identified peaks and  
774 the number overlapping the same genomic region in the Input sample were counted and used to  
775 calculate fold enrichment (normalized by total mapping fragments counts in each data set), with  
776 enrichment P-value calculated by Yates' Chi-Square test or Fisher Exact Test where the observed or  
777 expected fragments number was below 5. Benjamini-Hochberg FDR procedure was applied for  
778 multiple testing corrections. Peaks presenting log<sub>2</sub> fold enrichment over Input >2 and FDR < 0.05 in  
779 both Ip samples were selected as enriched regions (**Supplementary File 3**). BEDtools intersect tool  
780 was used to annotate such regions based on their overlap with Ensembl 87 gene annotation and to  
781 filter out transcripts hosting regions enriched in the IgG sample. Furthermore, htseq-count software  
782 ([Anders et al., 2015](#)) with *-s no -m union -t gene* parameters was used to count reads from deduplicated  
783 BAM files. Peaks overlapping transcripts with Input CPM (counts per million) > Ip CPM in both Ip  
784 samples were filtered out. Gene Ontology analysis was performed on protein coding genes  
785 overlapping enriched regions using WebGestalt R package ([Liao et al., 2019](#)). Bigwig of normalized  
786 coverage (RPM, reads per million) files were produced using bamCoverage 3.5.1 from deepTools  
787 tool set (<http://deeptools.readthedocs.io/en/develop>) on BAM files of uniquely mapping and  
788 deduplicated reads using *--normalizeUsing CPM* parameter ([Ramirez et al., 2014](#)). Normalized  
789 coverage tracks were visualized with IGV software (<https://software.broadinstitute.org/software/igv/>)  
790 and Gviz R package ([Hahne et al., 2016](#)).

791 Local Motif Enrichment analysis was performed by using 10 nt-long sliding windows. For each  
792 relative peak position/control set, the proportion of windows containing or not MATR3 motif was  
793 calculated and tested for significant differences using two tails Fisher exact test. CLIP-seq IP signal  
794 (FPM) relative to each position was retrieved from bigwig files using pyBigWig  
795 (<https://github.com/deeptools/pyBigWig>). Motif Enrichment Analysis was performed using AME



796 software from MEME suite ([Bailey et al., 2015](#)) on a 100 nt window centred on the peak summit. For  
797 each identified peak, a control set was by selecting 10 random regions from expressed (CPM>0) RNA  
798 precursors. Differential analysis of MATR3 binding between Charm<sup>WT</sup> and Charm<sup>KO</sup> conditions  
799 was assessed using DiffBind software ([Ross-Innes et al., 2012](#)).

800

## 801 **Protein analyses**

802 Protein extracts were prepared and analysed by western blot as in [Desideri et al., 2020](#). See  
803 **Supplementary File 5** for antibodies details.

804

## 805 **Single cell transcriptomics**

806 scRNAseq analysis was performed on publicly available datasets of E12.5 mouse hearts  
807 (SRR10969391, [Jackson-Weaver et al. 2020](#)). FASTQ reads were aligned, filtered and counted  
808 through the Cell Ranger pipeline (v4.0) using standard parameters. GRCm38 genome version was  
809 used in alignment step and annotation refers to Ensembl Release87. The dataset was cleaned  
810 (nFeature\_RNA > 200 and < 6000, percent.mt > 0 and < 5, nCount\_RNA > 500 and < 40000) and  
811 cells were clustered using Seurat 4.0.5 ([Stuart et al., 2019](#)). Cluster uniformity was then checked using  
812 COTAN ([Galfrè et al., 2020](#)) by evaluating if less than 1% of genes were over the threshold of 1.5 of  
813 GDI. If a cluster resulted not uniform, with more than 1% of genes above 1.5, a new round of  
814 clustering was performed. After this iterative procedure, the few remaining cells not fitting any  
815 cluster, were discarded. A dataset of 4014 cells and 34 clusters was obtained. COTAN function  
816 *clustersDeltaExpression* (github devel branch) was used to obtain a correlation coefficient and a *p*-  
817 value for each gene and each cluster. From the correlation matrix, a cosine dissimilarity between  
818 clusters was estimated and used to plot a dendrogram (with the ward.D2 algorithm, **Figure 1-figure**  
819 **supplement 1D**). The tree was used to decide which clusters could be merged. Cell type for each  
820 final cluster was assigned based on a list of markers ([Jackson-Weaver et al., 2020](#); [Li et al., 2016](#)) as

821 follows. Cardiomyocytes (1834 cells): Myh6+, Nppa+, Atrial CM (333 cells): are also Myl1+, Myl4+  
822 , Ventricular CM (1289): are also Myl2+, Myl3+, interventricular septum CM (117 cells): are also  
823 TBX20+, Gja5+ ([Franco et al., 2006](#)), Venous Pole CM (95 cells): also Osr1+ ([Meilhac et al., 2018](#)),  
824 Outflow Tract CM (72 cells): also Is11+, Sema3c+, Neural crest cells (there are two clusters  
825 expressing their markers: 1.NC with 48 cells and 2.NC with 68 cells): Msx1+, Twist1+, Sox9+,  
826 Epicardial cells (359 cells): Cebpb+, Krt18+, Fibroblasts like cells (278 cells): Tcf21+, Fn1+,  
827 Endothelial cells (168 cells): Klf2+, Pecam1+, Cdh5+, Smooth muscle cells (710 cells): Cnn1+,  
828 Acta2+, Tagln2+, Tagln+, Hemopoietic myeloid cells (79 cells): Fcer1g+, Hemopoietic red blood  
829 cells (397 cells): Hba-a1+. The final UMAP plot with the cell assignment is shown in **Figure 1-figure**  
830 **supplement 1E**. Heatmap in **Figure 1-figure supplement 1F** shows a coherent assignment between  
831 final clusters and cell type with additional marker genes. For correlation analyses (**Figure 1G**),  
832 relevant genes in each subpopulation of interest (CM-VP, CM-OFT, A-CM, CM-IVS, V-CM) were  
833 analysed separately by applying COTAN on a test dataset composed by the subpopulation in exam,  
834 together with a fixed contrasting cell group with the SM and EC cells (see **Figure 1E**).

835

## 836 **Echocardiography**

837 The echocardiographer was blinded to the phenotypes. Mice were anaesthetised with 2.5% Avertin  
838 (Sigma T48402) to perform echocardiographic structural (measurement of left ventricular diameters  
839 and wall thickness) and functional (fractional shortening) analyses with a VEVO 3100 (Visualsonics)  
840 using a mx550d probe. We used avertin since it does not induce significant cardiodepressant effects,  
841 potentially affecting our echocardiographic experiments compared to ketamine combinations, such  
842 as ketamine+xylazine. The fractional shortening (FS) of the left ventricle was calculated as  $FS\% =$   
843  $(\text{left ventricular end-diastolic diameter (LVEDD)} - \text{left ventricular end-systolic diameter}$   
844  $(\text{LVESD}) / \text{LVEDD}) \times 100$ , representing the relative change of the left ventricular diameters during

845 the cardiac cycle. The mean FS of the left ventricle was determined by the average of FS  
846 measurements of the left ventricular contraction over 3 beats.

847

#### 848 **Data accessibility**

849 The data presented in this study will be openly available in NCBI Gene Expression Omnibus (GEO)  
850 database (<https://www.ncbi.nlm.nih.gov/geo/>), reference number GSE200878 for RNA-seq data and  
851 GSE200877 for MATR3 CLIP-seq data.

852

#### 853 **Statistical methods and rigour**

854 Statistical tests, p-values, and n for each analysis are reported in the corresponding figure legend. For  
855 each experiment, at least three individual animals or pools of littermates were used (see each figure  
856 legend for details). No sex bias was introduced by randomly choosing among male and female mice.  
857 All analyses were performed by 1 or more blinded investigators.

858

#### 859 **Competing interest**

860 The authors declare no competing interests.

861

#### 862 **Acknowledgments**

863 The authors acknowledge Pietro Laneve, Francesca Pagano, Andrea Cipriano and Marco D'Onghia  
864 for helpful discussion, Alessandro Calicchio for cloning the probe templates for *in-situ* hybridization  
865 analyses and Marcella Marchioni for technical help. This work was supported by grants from  
866 Sapienza University (prot. RM11916B7A39DCE5 and RM12117A5DE7A45B), POR FESR Lazio  
867 2020-T0002E0001 and MUR PNRR “National Center for Gene Therapy and Drugs based on RNA  
868 Technology” (Project no. CN3221842F1B2436 CN3\_Spoke 3) to MB.

869

870 **REFERENCES**

- 871 Akerberg BN, Gu F, VanDusen NJ, Zhang X, Dong R, Li K, Zhang B, Zhou B, Sethi I, Ma Q, et al. 2019. A  
872 reference map of murine cardiac transcription factor chromatin occupancy identifies dynamic and conserved  
873 enhancers. *Nat Commun* **10**: 4907.
- 874 Ajima R, Akazawa H, Kodama M, Takeshita F, Otsuka A, Kohno T, Komuro I, Ochiya T, Yokota J. 2008.  
875 Deficiency of Myo18B in mice results in embryonic lethality with cardiac myofibrillar aberrations. *Genes  
876 Cells* **13**:987-99.  
877
- 878 Anders S, Pyl PT, Huber W. 2015. HTSeq--a Python framework to work with high-throughput sequencing  
879 data. *Bioinformatics* **31**:166-169.
- 880 Anderson K, Anderson D, McAnally J, Shelton JM, Bassel-Duby R, Olson EN. 2016. Transcription of the  
881 non-coding RNA upperhand controls Hand2 expression and heart development. *Nature* **539**: 433–436.
- 882 Anderson DM, Anderson KM, Nelson BR, McAnally JR, Bezprozvannaya S, Shelton JM, Bassel-Duby R, &  
883 Olson EN. 2021. A myocardin-adjacent lncRNA balances SRF-dependent gene transcription in the heart.  
884 *Genes & development* **35**: 835–840.
- 885 Ang YS, Rivas RN, Ribeiro A, Srivas R, Rivera J, Stone NR, Pratt K, Mohamed T, Fu JD, Spencer CI, et al.  
886 2016. Disease Model of GATA4 Mutation Reveals Transcription Factor Cooperativity in Human  
887 Cardiogenesis. *Cell* **167**: 1734–1749.
- 888 Aydin B, Kakumanu A, Rossillo M, Moreno-Estellés M, Garipler G, Ringstad N, Flames N, Mahony S, &  
889 Mazzoni EO. 2019. Proneural factors Ascl1 and Neurog2 contribute to neuronal subtype identities by  
890 establishing distinct chromatin landscapes. *Nature Neuroscience* **22**: 897.
- 891 Azad FM, Polignano LI, Proserpio V, Oliviero S. 2021. Long Noncoding RNAs in Human Stemness and  
892 Differentiation. *Trends in Cell Biology* **31**: 542-545.
- 893 Bailey TL, Johnson J, Grant CE, Noble WS. 2015. The MEME Suite. *Nucleic Acids Res.* **43**(W1):W39-49.
- 894 Ballarino M, Cazzella V, D'Andrea D, Grassi L, Bisceglie L, Cipriano A, Santini T, Pinnarò C, Morlando M,  
895 Tramontano A, Bozzoni I. 2015. Novel Long Noncoding RNAs (lncRNAs) in Myogenesis: a miR-31  
896 Overlapping lncRNA Transcript Controls Myoblast Differentiation. *Molecular and Cellular Biology*, **35**: 728–  
897 736.
- 898 Ballarino M, Cipriano A, Tita R, Santini T, Desideri F, Morlando M, Colantoni A, Carrieri C, Nicoletti C,  
899 Musarò A, Carroll DO, Bozzoni I. 2018. Deficiency in the nuclear long noncoding RNA Charme causes  
900 myogenic defects and heart remodeling in mice. *The EMBO Journal* **37**: e99697.
- 901 Banerjee A, Vest KE, Pavlath GK, Corbett AH. 2017. Nuclear poly(A) binding protein 1 (PABPN1) and  
902 Matr3 interact in muscle cells and regulate RNA processing. *Nucleic Acids Research* **45**: 10706–10725.
- 903 Barnett DW, Garrison EK, Quinlan AR, Strömberg MP, Marth GT. 2011. BamTools: a C++ API and toolkit  
904 for analyzing and managing BAM files. *Bioinformatics* **27**:1691-2.
- 905 Bhat P, Honson D, Guttman M. 2021. Nuclear compartmentalization as a mechanism of quantitative control  
906 of gene expression. *Nat Rev Mol Cell Biol* **22**:653-670.
- 907 Bolger AM, Lohse M, Usadel B. 2014. Trimmomatic: A flexible trimmer for Illumina sequence data.  
908 *Bioinformatics* **30**: 2114–2120.
- 909 Bouveret R, Waardenberg AJ, Schonrock N, Ramialison M, Doan T, de Jong D, Bondue A, Kaur G, Mohamed  
910 S, Fonoudi H, et al. 2015. NKX2-5 mutations causative for congenital heart disease retain functionality and  
911 are directed to hundreds of targets. *eLife* **4**: e06942.

- 912 Bruneau BG. 2013. Signaling and transcriptional networks in heart development and regeneration. *Cold Spring*  
913 *Harbor perspectives in biology* **5**: a008292.
- 914 Buckingham M. 2017. Gene regulatory networks and cell lineages that underlie the formation of skeletal  
915 muscle. *PNAS* **114**: 5830-5837.
- 916 Buonaiuto G, Desideri F, Taliani V, Ballarino M. 2021. Muscle Regeneration and RNA: New Perspectives for  
917 Ancient Molecules. *Cells* **10**: 2512.
- 918 Castro-Mondragon JA, Riudavets-Puig R, Rauluseviciute I, Lemma RB, Turchi L, Blanc-Mathieu R, Lucas J,  
919 Boddie P, Khan A, Manosalva Pérez N et al. JASPAR 2022: the 9th release of the open-access database of  
920 transcription factor binding profiles. *Nucleic Acids Res.* 2022 Jan 7;50(D1):D165-D173. doi:  
921 10.1093/nar/gkab1113. PMID: 34850907; PMCID: PMC8728201.
- 922 Cazzella V, Martone J, Pinnarò C, Santini T, Twayana SS, Sthandier O, D'Amico A, Ricotti V, Bertini E,  
923 Muntoni F, Bozzoni I. 2012. Exon 45 skipping through U1-snRNA antisense molecules recovers the Dys-  
924 nNOS pathway and muscle differentiation in human DMD myoblasts. *Mol Ther.* **20**: 2134-42.
- 925 Center for Disease Control and Prevention, (2020, December 9). Data and Statistics on Congenital Heart  
926 Defects. <https://www.cdc.gov/ncbddd/heartdefects/data.html>
- 927 Cha HJ, Uyan Ö, Kai Y, Liu T, Zhu Q, Tothova Z, Botten GA, Xu J, Yuan GC, Dekker J, Orkin SH. 2021.  
928 Inner nuclear protein Matrin-3 coordinates cell differentiation by stabilizing chromatin architecture. *Nat*  
929 *Commun.* **12**: 6241.
- 930 Choquet C, Kelly RG, & Miquerol L. 2019. Defects in Trabecular Development Contribute to Left Ventricular  
931 Noncompaction. *Pediatric Cardiology* **40**: 1331–1338.
- 932 Chu H, Kohane DS, & Langer R. 2016. RNA therapeutics - The potential treatment for myocardial infarction.  
933 *Regenerative Therapy* **4**: 83–91.
- 934 Cipriano A, Ballarino M. 2018. The Ever-Evolving Concept of the Gene: The Use of RNA/Protein  
935 Experimental Techniques to Understand Genome Functions. *Front Mol Biosci* **6**: 5-20.
- 936 Coelho MB, Attig J, Ule J, Smith CW. 2016. Matrin3: connecting gene expression with the nuclear matrix.  
937 *Wiley Interdiscip Rev RNA* **7**: 303-15.
- 938 D'Ambra E, Santini T, Vitiello E, D'Uva S, Silenzi V, Morlando M, Bozzoni I. 2021. Circ-Hdgfrp3 shuttles  
939 along neurites and is trapped in aggregates formed by ALS-associated mutant FUS. *iScience* **24**: 103504.
- 940 D'Antonio M, Nguyen JP, Arthur TD, Matsui H, Donovan MKR, D'Antonio-Chronowska A, Frazer KA. 2022.  
941 In heart failure reactivation of RNA-binding proteins is associated with the expression of 1,523 fetal-specific  
942 isoforms. *PLoS computational biology* **18**: e1009918.
- 943 DeLaughter DM, Bick AG, Wakimoto H, McKean D, Gorham JM, Kathiriya IS, Hinson JT, Homsy J, Gray J,  
944 Pu W, et al. 2016. Single-Cell Resolution of Temporal Gene Expression during Heart Development. *Dev Cell*  
945 **39**:480-490.
- 946 Desideri F, Cipriano A, Petrezselyova S, Buonaiuto G, Santini T, Kasperek P, Prochazka J, Janson, G, Paiardini  
947 A, et al. 2020. Intronic Determinants Coordinate Charme lncRNA Nuclear Activity through the Interaction  
948 with MATR3 and PTBP1. *Cell Reports* **33**: 108548.
- 949 de Soysa TY, Ranade SS, Okawa S, et al. 2019 Single-cell analysis of cardiogenesis reveals basis for organ-  
950 level developmental defects. *Nature* **572**: 120-124.
- 951 Dobin A, Davis CA, Schlesinger F, Drenkow J, Zaleski C, Jha S, Batut P, Chaisson M, Gingeras TR. 2013.  
952 STAR: ultrafast universal RNA-seq aligner. *Bioinformatics* **29**:15-21.

- 953 Dunn NR, Vincent SD, Oxburgh L, Robertson EJ, Bikoff EK. 2004. Combinatorial activities of Smad2 and  
954 Smad3 regulate mesoderm formation and patterning in the mouse embryo. *Development* **131**: 1717-28.
- 955 England J, Loughna S. 2013. Heavy and light roles: myosin in the morphogenesis of the heart. *Cell Mol Life*  
956 *Sci.* **70**:1221-39.
- 957 Feit H, Silbergleit A, Schneider LB, Gutierrez JA, Fitoussi RP, Réyès C, Rouleau GA, Brais B, Jackson CE,  
958 Beckmann JS, Seboun E. 1998. Vocal cord and pharyngeal weakness with autosomal dominant distal  
959 myopathy: clinical description and gene localization to 5q31. *Am J Hum Genet.* **63**:1732-42.
- 960 Franco D, Meilhac SM, Christoffels VM, Kispert A, Buckingham M, Kelly RG. 2006. Left and right  
961 ventricular contributions to the formation of the interventricular septum in the mouse heart. *Dev Biol.* **294**:  
962 366-375.
- 963 Galfrè SG, Morandin F, Pietrosanto M, Cremisi F, Helmer-Citterich M. 2020. COTAN: scRNA-seq data  
964 analysis based on gene co-expression, *NAR Genomics and Bioinformatics* 3: lqab072.
- 965 García-Padilla C, Aránega A, Franco D. 2018. The role of long non-coding RNAs in cardiac development and  
966 disease. *AIMS Genet* **5**: 124-140.
- 967 Goonasekera SA, Hammer K, Auger-Messier M, Bodi I, Chen X, Zhang H, Reiken S, Elrod JW, Correll RN,  
968 York AJ, et al. 2012. Decreased cardiac L-type Ca<sup>2+</sup> channel activity induces hypertrophy and heart failure in  
969 mice. *J Clin Invest* **122**: 280-290.
- 970 Grote P, Wittler L, Hendrix D, Koch F, Währisch S, Beisaw A, Macura K, Bläss G, Kellis M, Werber M, et  
971 al. 2013. The tissue-specific lncRNA Fendrr is an essential regulator of heart and body wall development in  
972 the mouse. *Dev Cell* **24**:206-214.
- 973 Hahne F, Ivanek R. 2016. Visualizing Genomic Data Using Gviz and Bioconductor. *Methods Mol Biol* **18**:  
974 335-51.
- 975 Hall JM, Kainth AS, Rowton MJ, Lu E, Haddad G, Keplinger AJ, Šćepanović J, Perez-Cervantes S, Chan  
976 SSK, Piccirilli JA, et al. 2021. The cardiac lncRNA Chantico directly regulates *Cxcl1* chemokine transcription.  
977 *bioRxiv* doi: 10.1101/2021.12.23.474040.
- 978 Han P, Li W, Lin CH, Yang J, Shang C, Nurnberg ST, Jin KK, Xu W, Lin CY, Lin CJ, et al. 2014. A long  
979 noncoding RNA protects the heart from pathological hypertrophy. *Nature* **514**: 102–106.
- 980 Han X, Zhang J, Liu X, Fan X, Ai S, Luo Y, Li X, Jin H, Luo S, Zheng H, et al. 2019. The lncRNA  
981 Hand2os1/Uph locus orchestrates heart development through regulation of precise expression of Hand2.  
982 *Development* **146**: dev176198.
- 983 Hazra R, Brine L, Garcia L, Benz B, Chirathivat N, Shen MM, Wilkinson JE, Lyons SK, Spector DL. 2022.  
984 Platr4 is an early embryonic lncRNA that exerts its function downstream on cardiogenic mesodermal lineage  
985 commitment. *Developmental cell* **57**: 2450–2468.e7.
- 986 Higaki T, Akita K, Katoh K. 2020. Coefficient of variation as an image-intensity metric for cytoskeleton  
987 bundling. *Scientific Reports* **10**:22187.  
988
- 989 Horsthuis T, Houweling AC, Habets PE. MH, De Lange FJ, El Azzouzi H, Clout DEW, Moorman AFM,  
990 Christoffels VM. 2008. Distinct regulation of developmental and heart disease-induced atrial natriuretic factor  
991 expression by two separate distal sequences. *Circulation Research* **102**: 849–859.
- 992 Hu G, Niu F, Humburg BA, Liao K, Bendi S, Callen S, Fox HS, Buch S. 2018. Molecular mechanisms of long  
993 noncoding RNAs and their role in disease pathogenesis. *Oncotarget* **9**: 18648–18663.

- 994 Ikeda S, Mizushima W, Sciarretta S, Abdellatif M, Zhai P, Mukai R, Fefelova N, Oka SI, Nakamura M, Del  
995 Re DP, et al. 2019. Hippo Deficiency Leads to Cardiac Dysfunction Accompanied by Cardiomyocyte  
996 Dedifferentiation During Pressure Overload. *Circ Res.* **124**: 292-305.
- 997 Jackson-Weaver O, Ungvijanpunya N, Yuan Y, Qian J, Gou Y, Wu J, Shen H, Chen Y, Li M, et al. 2020.  
998 PRMT1-p53 Pathway Controls Epicardial EMT and Invasion. *Cell Rep* **31**:107739.
- 999 Jusic A, Thomas PB, Wettinger SB, Dogan S, Farrugia R, Gaetano C, Tuna BG, Pinet F, Robinson EL, Tual-  
1000 Chalot S, Stellos K, Devaux Y. 2022. EU-CardioRNA COST Action CA17129. Noncoding RNAs in age-  
1001 related cardiovascular diseases. *Ageing Res Rev.* **77**:101610.
- 1002 Kattman SJ, Witty AD, Gagliardi M, Dubois NC, Niapour M, Hotta A, Ellis J, Keller G. 2011. Stage-specific  
1003 optimization of activin/nodal and BMP signaling promotes cardiac differentiation of mouse and human  
1004 pluripotent stem cell lines. *Cell Stem Cell.* **8**:228-40.
- 1005 Kim NJ, Lee KH, Son Y, Nam AR, Moon EH, Pyun JH, Park J, Kang JS, Lee YJ, Cho JY. 2021.  
1006 Spatiotemporal expression of long noncoding RNA Moshe modulates heart cell lineage commitment. *RNA*  
1007 *Biol.* **18**: 640-654.
- 1008 Klattenhoff CA, Scheuermann JC, Surface LE, Bradley RK, Fields PA, Steinhauser ML, Ding H, Butty VL,  
1009 Torrey L, Haas S et al., 2013. Braveheart, a long noncoding RNA required for cardiovascular lineage  
1010 commitment. *Cell* **152**: 570–583.
- 1011 Kodo K, Nishizawa T, Furutani M, Arai S, Yamamura E, Joo K, Takahashi T, Matsuoka R, Yamagishi H.  
1012 2009. GATA6 mutations cause human cardiac outflow tract defects by disrupting semaphorin-plexin signaling.  
1013 *Proceedings of the National Academy of Sciences of the United States of America* **106**: 13933–13938.
- 1014 Latham SL, Weiß N, Schwanke K, Thiel C, Croucher DR, Zweigerdt R, Manstein DJ, Taft MH. 2020. Myosin-  
1015 18B Regulates Higher-Order Organization of the Cardiac Sarcomere through Thin Filament Cross-Linking  
1016 and Thick Filament Dynamics. *Cell Rep* **32**: 108090.
- 1017 Li G, Xu A, Sim S, Priest JR, Tian X, Khan T, Quertermous T, Zhou B, Tsao PS, Quake SR, et al. 2016.  
1018 Transcriptomic Profiling Maps Anatomically Patterned Subpopulations among Single Embryonic Cardiac  
1019 Cells. *Dev Cell* **39**:491-507.
- 1020 Li H, Handsaker B, Wysoker A, Fennell T, Ruan J, Homer N, Marth G, Abecasis G, Durbin R. 2009.1000  
1021 Genome Project Data Processing Subgroup. The Sequence Alignment/Map format and SAMtools.  
1022 *Bioinformatics* **25**: 2078-2079.
- 1023 Liao Y, Wang J, Jaehnig EJ, Shi Z, Zhang B. 2019. WebGestalt 2019: gene set analysis toolkit with revamped  
1024 UIs and APIs. *Nucleic Acids Res.* **47**:W199-W205.
- 1025 Luna-Zurita L, Stirnimann CU, Glatt S, Kaynak BL, Thomas S, Baudin F, Samee MAH, He D, Small EM,  
1026 Mileikovsky M, et al. 2016. Complex Interdependence Regulates Heterotypic Transcription Factor  
1027 Distribution and Coordinates Cardiogenesis. *Cell* **164**: 999–1014.
- 1028 MacGrogan D, Münch J, de la Pompa JL. 2018. Notch and interacting signalling pathways in cardiac  
1029 development, disease, and regeneration. *Nat Rev Cardiol.* **15**: 685-704.
- 1030 Malik AM, Miguez RA, Li X, Ho YS, Feldman EL, Barmada SJ. 2018. Matrin 3-dependent neurotoxicity is  
1031 modified by nucleic acid binding and nucleocytoplasmic localization. *Elife* **17**;7:e35977.
- 1032 Martin M. 2011. Cutadapt removes adapter sequences from high-throughput sequencing reads.  
1033 *EMBnet.journal* **17**: 10-12.
- 1034 Mattick J. 2004. RNA regulation: a new genetics?. *Nat Rev Genet* **5**: 316–323.

- 1035 Meilhac SM, Buckingham ME. 2018. The deployment of cell lineages that form the mammalian heart. *Nat*  
1036 *Rev Cardiol* **15**:705-724.
- 1037 Morton SU, Quiat D, Seidman, JG, Seidman C E. 2022. Genomic frontiers in congenital heart disease. *Nature*  
1038 *reviews. Cardiology* **19**: 26–42.
- 1039 Moorman AF, Christoffels VM. 2003. Cardiac chamber formation: development, genes, and evolution. *Physiol*  
1040 *Rev* **83**: 1223-67.
- 1041 Nadadur RD, Broman MT, Boukens B, Mazurek SR, Yang X, van den Boogaard M, Bekeny J, Gadek M,  
1042 Ward T, Zhang M, et al. 2016. Pitx2 modulates a Tbx5-dependent gene regulatory network to maintain atrial  
1043 rhythm. *Science translational medicine* **8**: 354ra115.
- 1044 Noguchi S, Arakawa T, Fukuda S, Furuno M, Hasegawa A, Hori F, Ishikawa-Kato S, Kaida K, Kaiho A,  
1045 Kanamori-Katayama M, et al. 2017. FANTOM5 CAGE profiles of human and mouse samples. *Scientific Data*  
1046 **4**: 1–10.
- 1047 Olson E. 1993. Regulation of muscle transcription by the MyoD family. The heart of the matter. *Circulation*  
1048 *research* **72**: 1-6.
- 1049 Ounzain S, Micheletti R, Arnan C, Plaisance I, Cecchi D, Schroen B, Reverter F, Alexanian M, Gonzales C,  
1050 Ng, SY, Bussotti G et al., 2015. CARMEN, a human super enhancer-associated long noncoding RNA  
1051 controlling cardiac specification, differentiation and homeostasis. *Journal of molecular and cellular*  
1052 *cardiology* **89**: 98–112.
- 1053 Padula SL, Velayutham N, Yutzey KE. 2021. Transcriptional Regulation of Postnatal Cardiomyocyte  
1054 Maturation and Regeneration. *Int J Mol Sci.* **22**(6):3288.
- 1055 Pagano F, Calicchio A, Picchio V, Ballarino M. 2020. The Noncoding Side of Cardiac Differentiation and  
1056 Regeneration. *Current Stem Cell Research & Therapy* **15**: 723–738.
- 1057 Pinheiro A, Naya FJ. 2021. The Key Lnc (RNA)s in Cardiac and Skeletal Muscle Development, Regeneration,  
1058 and Disease. *Journal of Cardiovascular Development and Disease* **8**: 84.
- 1059 Ponnusamy M, Liu F, Zhang YH, Li RB, Zhai M, Liu F, Zhou LY, Liu CY, Yan KW, Dong YH, et al. 2019.  
1060 Long Noncoding RNA CPR (Cardiomyocyte Proliferation Regulator) Regulates Cardiomyocyte Proliferation  
1061 and Cardiac Repair. *Circulation* **139**: 2668–2684.
- 1062 Quinlan AR, Hall IM. 2010. BEDTools: a flexible suite of utilities for comparing genomic features.  
1063 *Bioinformatics* **26**: 841-842.
- 1064 Quintero-Rivera F, Xi QJ, Keppler-Noreuil KM, Lee JH, Higgins AW, Anchan RM, Roberts AE, Seong IS,  
1065 Fan X, Lage K, et al. 2015. MATR3 disruption in human and mouse associated with bicuspid aortic valve,  
1066 aortic coarctation and patent ductus arteriosus. *Human molecular genetics* **24**: 2375–2389.
- 1067 Ramesh N, Kour S, Anderson EN, Rajasundaram D, Pandey UB. 2020. RNA-recognition motif in Matrin-3  
1068 mediates neurodegeneration through interaction with hnRNPM. *Acta neuropathol commun* **8**, 138.
- 1069 Ramírez F, Dünder F, Diehl S, Grüning BA, Manke T. 2014. deepTools: a flexible platform for exploring  
1070 deep-sequencing data. *Nucleic Acids Res* **42**: W187-91.
- 1071 Ray D, Kazan H, Cook KB, Weirauch MT, Najafabadi HS, Li X, Gueroussov S, Albu M, Zheng H, Yang A,  
1072 et al. 2013, A compendium of RNA-binding motifs for decoding gene regulation. *Nature* **499**: 172–177.
- 1073 Ribeiro DM, Zanzoni A, Cipriano A, Delli Ponti R, Spinelli L, Ballarino M, Bozzoni I, Tartaglia GG, Brun C.  
1074 2018. Protein complex scaffolding predicted as a prevalent function of long non-coding RNAs. *Nucleic Acids*  
1075 *Research* **46**: 917–928.



- 1076 Rinn JL, Chang HY. 2012. Genome regulation by long noncoding RNAs. *Annual review of biochemistry* **81**:  
1077 145–166.
- 1078 Ritter N, Ali T, Kopitchinski N, Schuster P, Beisaw A, Hendrix DA, Schulz MH, Müller-McNicoll M,  
1079 Dimmeler S, Grote P. 2019. The lncRNA Locus Handsdown Regulates Cardiac Gene Programs and Is  
1080 Essential for Early Mouse Development. *Dev Cell.* **50**:644-657.
- 1081 Riva P, Ratti A, Venturin M. 2016. The Long Non-Coding RNAs in Neurodegenerative Diseases: Novel  
1082 Mechanisms of Pathogenesis. *Current Alzheimer research* **13**: 1219–1231.
- 1083 Robinson MD, McCarthy DJ, Smyth GK. 2010. edgeR: a Bioconductor package for differential expression  
1084 analysis of digital gene expression data. *Bioinformatics* **26**:139-40.
- 1085 Roden C, Gladfelter AS. 2021. RNA contributions to the form and function of biomolecular condensates. *Nat*  
1086 *Rev Mol Cell Biol* **22**:183-195.
- 1087 Ross-Innes CS, Stark R, Teschendorff AE, Holmes KA, Ali HR, Dunning MJ, Brown GD, Gojis O, Ellis IO,  
1088 Green AR, et al.,. 2012. Differential oestrogen receptor binding is associated with clinical outcome in breast  
1089 cancer. *Nature* **481**.
- 1090 Samsa LA, Yang B, & Liu J. 2013. Embryonic cardiac chamber maturation: Trabeculation, conduction, and  
1091 cardiomyocyte proliferation. *American Journal of Medical Genetics, Part C: Seminars in Medical Genetics*  
1092 **163**: 157–168.  
1093
- 1094 Scheuermann JC, Boyer LA. 2013. Getting to the heart of the matter: long non-coding RNAs in cardiac  
1095 development and disease. *EMBO J* **32**: 1805-16.  
1096
- 1097 Schneider CA, Rasband WS, Eliceiri KW, 2012. NIH Image to ImageJ: 25 years of image analysis. *Nat.*  
1098 *Methods* **9** 671–675,  
1099
- 1100 Senderek J, Garvey SM, Krieger M, Guergueltcheva V, Urtizbera A, Roos A, Elbracht M, Stendel C, Tournev  
1101 I, Mihailova V, et al.,. 2009. Autosomal-dominant distal myopathy associated with a recurrent missense  
1102 mutation in the gene encoding the nuclear matrix protein, matrin 3. *Am J Hum Genet.* **84**:511-8.  
1103
- 1104 Srivastava D. 2006. Genetic regulation of cardiogenesis and congenital heart disease. *Annual review of*  
1105 *pathology* **1**: 199–213.
- 1106 Sprunger ML, Lee K, Sohn BS, Jackrel ME. 2022. Molecular determinants and modifiers of Matrin-3  
1107 toxicity, condensate dynamics, and droplet morphology. *iScience* **25**:103900.  
1108
- 1109 Steimle JD, Moskowitz IP. 2017. TBX5: A Key Regulator of Heart Development. *Current topics in*  
1110 *developmental biology*, **122**: 195–221.
- 1111 Stuart T, Butler A, Hoffman P, Hafemeister C, Papalexi E, Mauck WM 3rd, Hao Y, Stoeckius M, Smibert P,  
1112 Satija R. 2019. Comprehensive Integration of Single-Cell Data. *Cell* **177**:1888-1902.
- 1113 Tao YK, Zeng H, Zhang GQ, Chen ST, Xie XJ, He X, Wang S, Wen H, Chen JX. 2017. Notch3 deficiency  
1114 impairs coronary microvascular maturation and reduces cardiac recovery after myocardial ischemia. *Int J*  
1115 *Cardiol* **236**:413-422.  
1116
- 1117 Tian X, Li Y, He L, Zhang H, Huang X, Liu Q, Pu W, Zhang L, Li Y, Zhao H, et al., 2017. Identification of a  
1118 hybrid myocardial zone in the mammalian heart after birth. *Nat Commun.* **20**:8(1):87
- 1119 Uemura Y, Oshima T, Yamamoto M, Reyes CJ, Costa Cruz PH, Shibuya T, & Kawahara Y. 2017. Matrin3  
1120 binds directly to intronic pyrimidine-rich sequences and controls alternative splicing. *Genes to cells : devoted*  
1121 *to molecular & cellular mechanisms* **22**: 785–798.

- 1122 Ulitsky I, Bartel DP. 2013. lincRNAs: genomics, evolution, and mechanisms. *Cell* **154**: 26–46.
- 1123 Uosaki H, Cahan P, Lee DI, Wang S, Miyamoto M, Fernandez L, Kass DA, Kwon C. 2015. Transcriptional  
1124 landscape of cardiomyocyte maturation. *Cell Rep* **13**:1705–1716.
- 1125 Uren PJ, Bahrami-Samani E, Burns SC, Qiao M, Karginov FV, Hodges E, Hannon GJ, Sanford JR, Penalva  
1126 LOF, Smith AD. 2012. Site identification in high-throughput RNA–protein interaction data. *Bioinformatics*  
1127 **28**: 3013–3020.
- 1128 van den Hoogenhof MMG, Beqqali A, Amin AS, van der Made I, Aufiero S, Khan MAF, Schumacher CA,  
1129 Jansweijer JA, van Spaendonck-Zwarts KY, Remme CA, et al. 2018. RBM20 Mutations Induce an  
1130 Arrhythmogenic Dilated Cardiomyopathy Related to Disturbed Calcium Handling. *Circulation* **138**: 1330–  
1131 1342.
- 1132 Wang K, Holt C, Lu J, Brohus M, Larsen KT, Overgaard MT, Wimmer R, Van Petegem F. 2018. Arrhythmia  
1133 mutations in calmodulin cause conformational changes that affect interactions with the cardiac voltage-gated  
1134 calcium channel. *Proc Natl Acad Sci U S A* **115**: E10556-E10565.
- 1135 Wang Y, Chen J, Cowan DB, Wang DZ. 2021. Non-coding RNAs in cardiac regeneration: Mechanism of  
1136 action and therapeutic potential. *Seminars in cell & developmental biology* **118**: 150–162.
- 1137 Wang Z, Zhang XJ, Ji YX, Zhang P, Deng KQ, Gong J, Ren S, Wang X, Chen I, Wang I, et al. 2016. The long  
1138 noncoding RNA Chaer defines an epigenetic checkpoint in cardiac hypertrophy. *Nat. Med.* **22**: 1131–1139.
- 1139 Yang XH, Nadadur RD, Hilvering CR, Bianchi V, Werner M, Mazurek SR, Gadek M, Shen KM, Goldman  
1140 JA, Tyan L et al. 2017. Transcription-factor-dependent enhancer transcription defines a gene regulatory  
1141 network for cardiac rhythm. *Elife* **6**: e31683.
- 1142 Yao RW, Wang Y, Chen LL. 2019. Cellular functions of long noncoding RNAs. *Nature cell biology* **21**: 542–  
1143 551.
- 1144 Zhao S, Guo Y, Sheng Q, Shyr Y. 2014. Advanced heat map and clustering analysis using heatmap3. *Biomed.*  
1145 *Res. Int* e986048.
- 1146 Zimmerman MS, Carswell Smith AG, Sable CA, Echko MM, Wilner LB, Olsen HE, Tasew Atalay H, Awasthi  
1147 A, Bhutta ZA, Boucher JL, et al. 2020. Global, regional, and national burden of congenital heart disease, 1990–  
1148 2017: a systematic analysis for the Global Burden of Disease Study 2017. *The Lancet. Child & adolescent*  
1149 *health* **4**: 185–200.

Figure 1-figure supplement 1

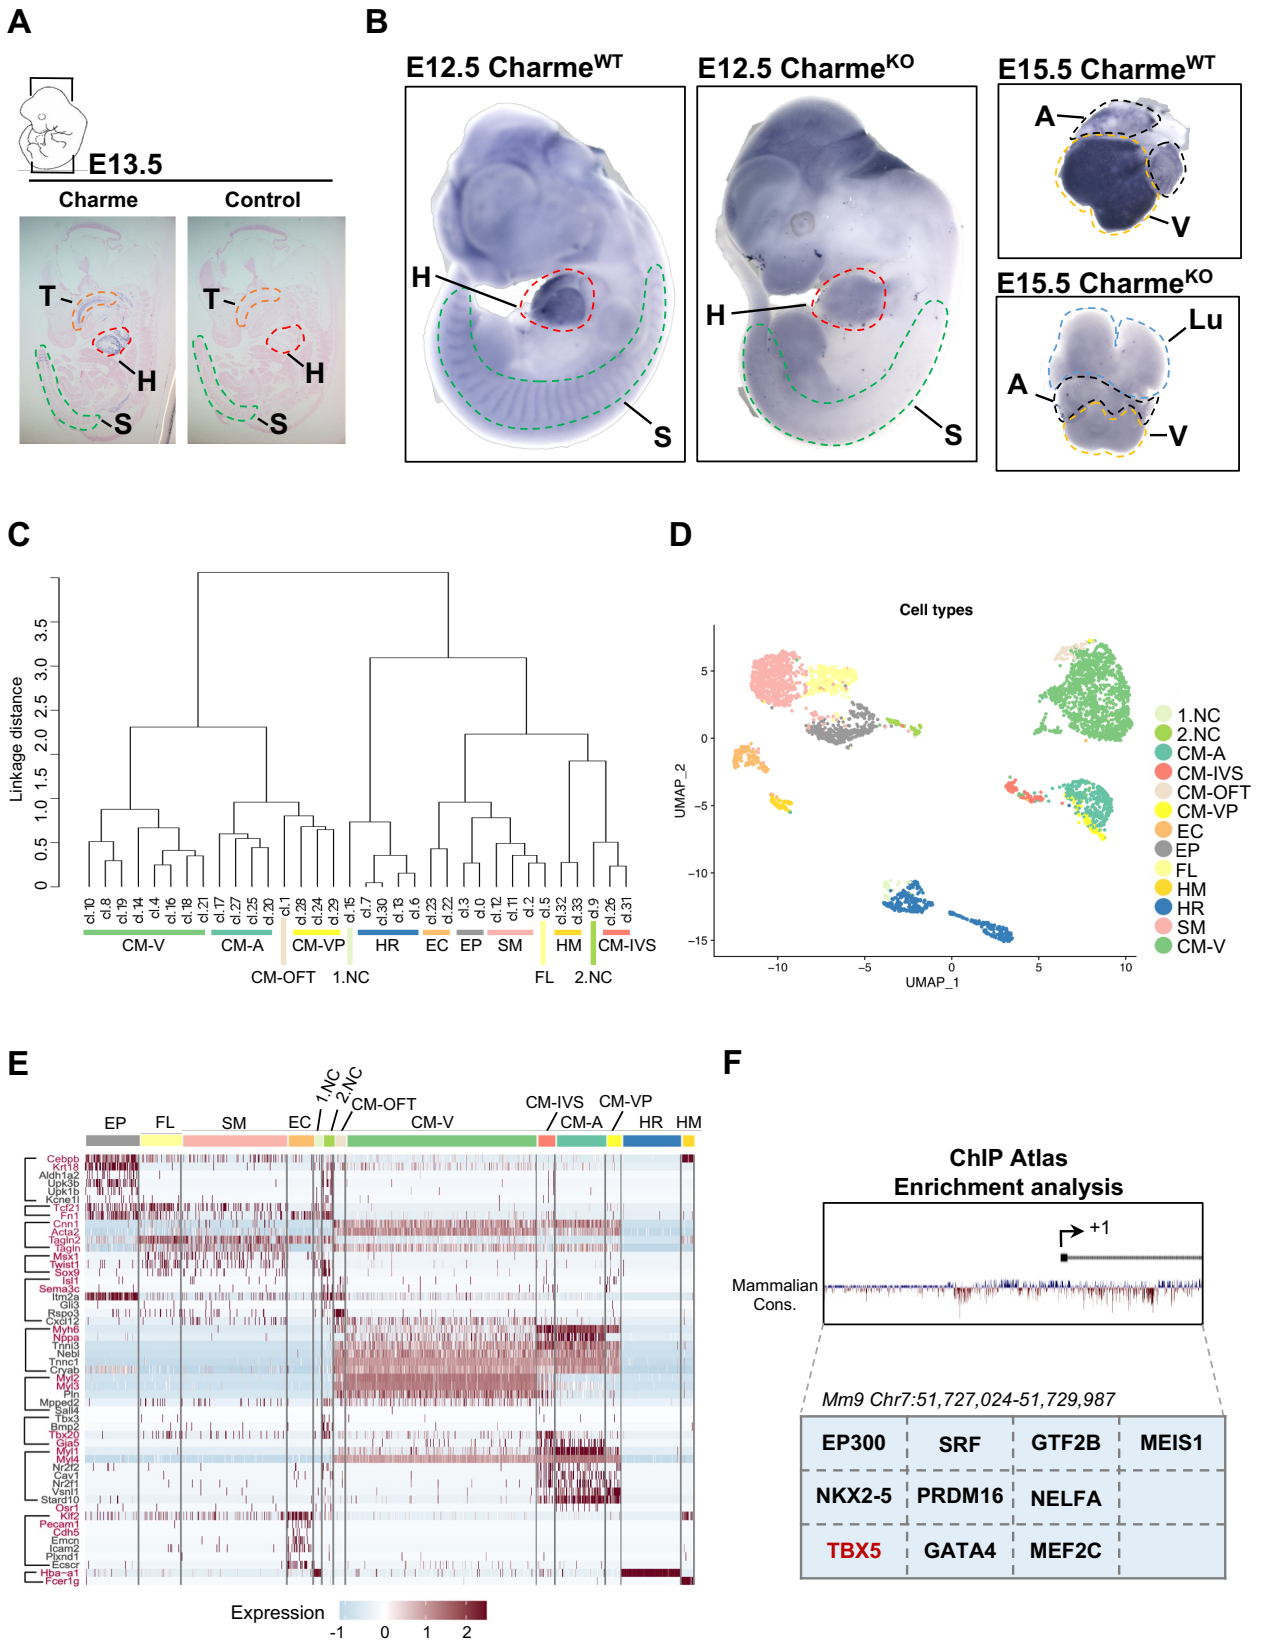

1150

1151 Figure 1-Figure supplement 1. Related to Figure 1

1152 **A)** *In-situ* hybridization (ISH) performed on E13.5 embryonal cryo-sections using digoxigenin-  
1153 labelled RNA antisense (Charme, left panel) or sense (control, right panel) probes against Charme.  
1154 T: Tongue (orange); H: Heart (red); S: Somites (green).

1155 **B)** Whole-mount *in-situ* hybridization (WISH) performed on Charme<sup>WT</sup> and Charme<sup>KO</sup> intact embryos  
1156 (E12.5, left panels) and hearts (E15.5, right panels). Signal is specifically detected in heart (H, red  
1157 line) and somites (S, green line). The specificity of the staining can be appreciated by the complete  
1158 absence of signals in the Charme<sup>KO</sup> samples. Heart (H, red line); Somites (S, green line); A: Atria  
1159 (black line); V: Ventricles (yellow line).

1160 **C)** Dendrogram showing the relationships between homogeneous clusters. All the informative  
1161 transcriptome was used to create a hierarchical clustering between homogeneous cell clusters.  
1162 Colored lines mark which clusters were merged for the final clustering (Figure 1-Figure supplement  
1163 1D-E). CM: Cardiomyocytes, A-CM: Atrial-CM, V-CM: Ventricular-CM, ISV: Interventricular  
1164 Septum, VP: Venous Pole, OFT: Outflow Tract, NC: Neural Crest cell, EP: Epicardial cells, FL:  
1165 Fibroblasts like cells, EC: Endothelial Cells, SM: Smooth Muscle cells, HM: Hemopoietic Myeloid  
1166 cells, HR: Hemopoietic Red blood cells.

1167 **D)** Seurat (Stuart et al., 2019) UMAP plot coloured by final cell assignments. See Materials and  
1168 Methods for details.

1169 **E)** Heatmap was generated by Seurat DoHeatmap (Stuart et al., 2019) and represents, for each cell of  
1170 the identified sub-populations, the log normalized expression of cell identity markers (listed on the  
1171 left). Genes used for cell clustering are marked in red. Maximum expression value (red), minimum  
1172 expression value (light blue). Correspondence between gene markers and cell types is indicated on  
1173 the left.

1174 **F)** *In silico* analysis of cardiovascular TF binding sites on Charme promoter using the enrichment  
1175 analysis tool on the ChIP Atlas database ([https://chip-atlas.org/enrichment\\_analysis](https://chip-atlas.org/enrichment_analysis)) by setting the  
1176 threshold at 200.



Figure 2-figure supplement 1

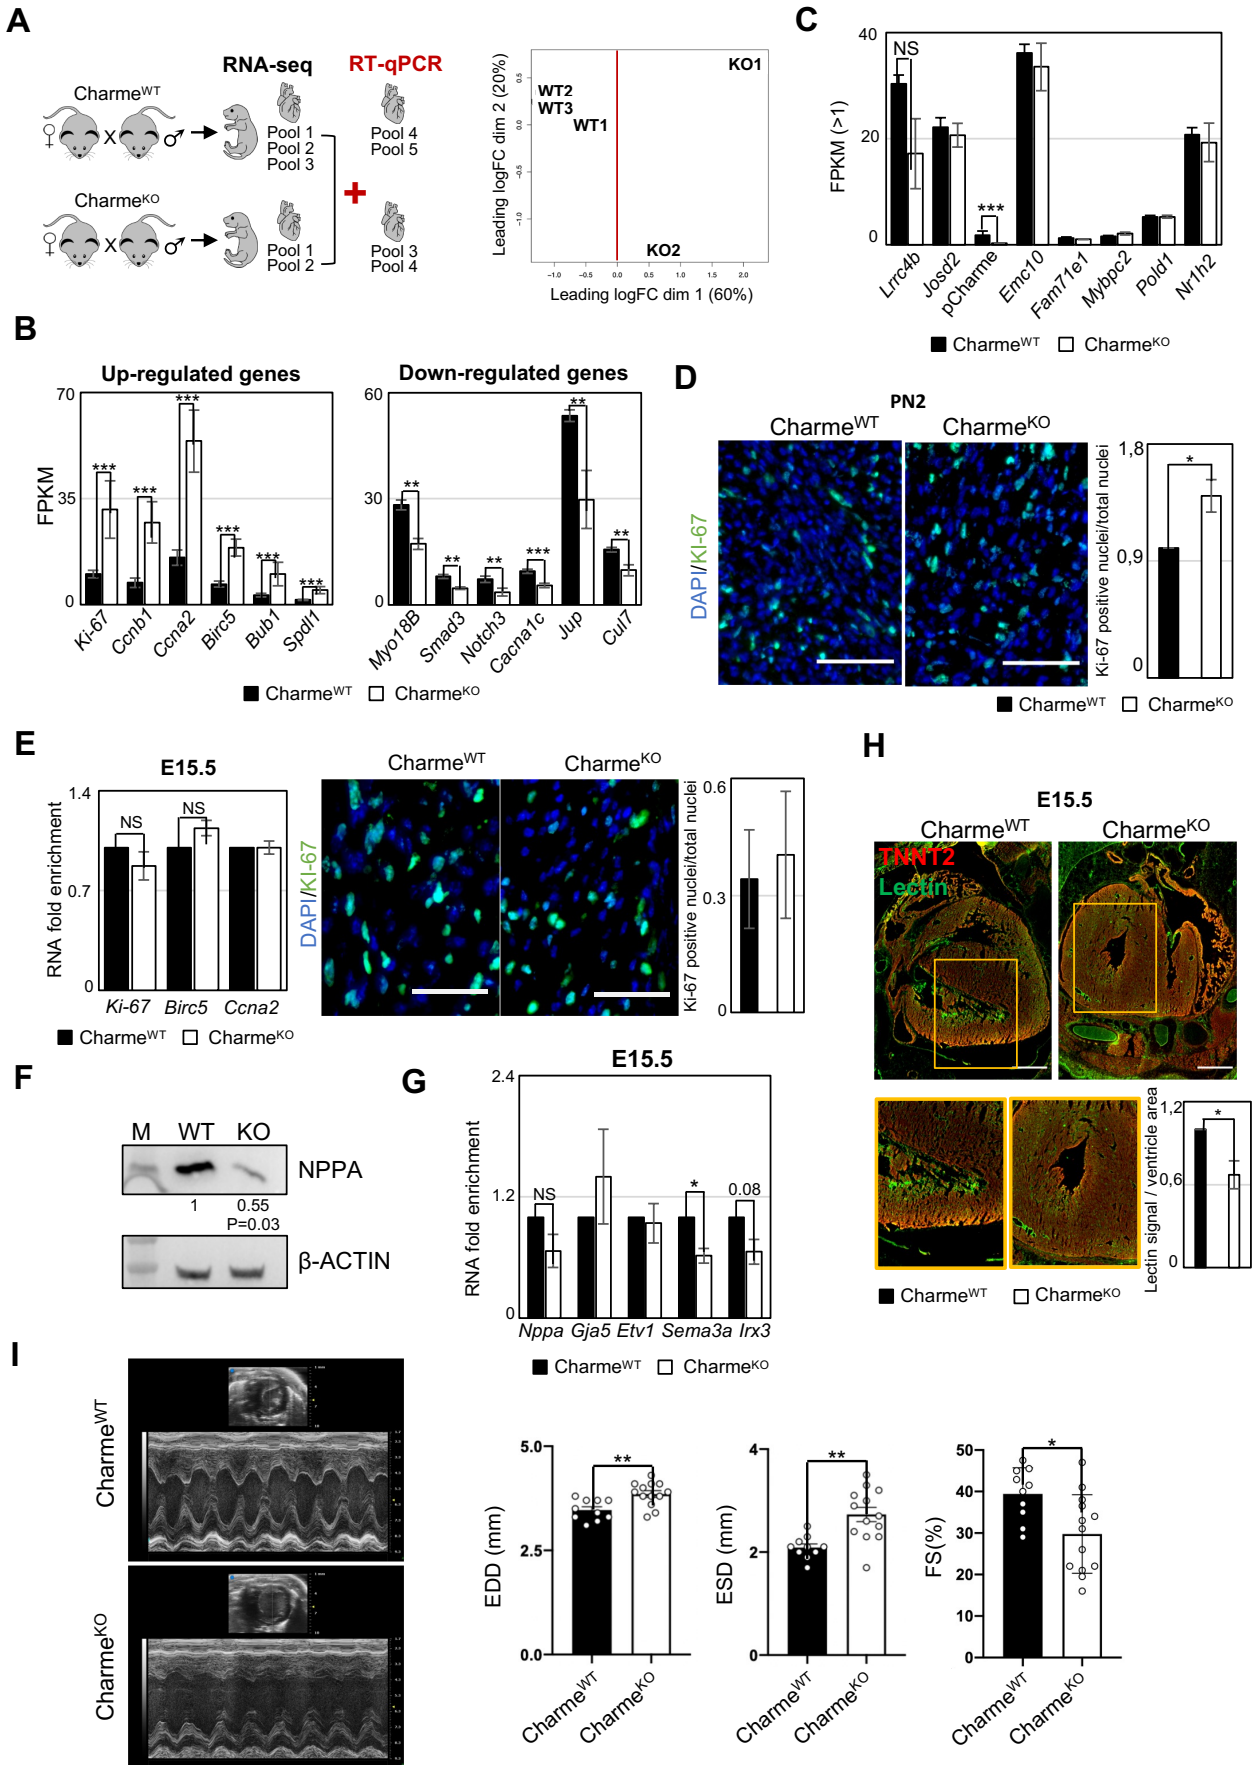

1179 **Figure 2-Figure supplement 1. Related to Figure 2**

1180 **A)** Schematic overview of the workflow to identifying DEGs from *Charme*<sup>WT</sup> and *Charme*<sup>KO</sup>  
1181 transcriptomes (left panel). Multi-dimensional scaling plot of leading fold-change (FC) between each  
1182 pair of *Charme*<sup>WT</sup> and *Charme*<sup>KO</sup> RNA-seq samples (right panel). Plot was obtained by using the  
1183 `plotMDS` function from `edgeR` package  
1184 ([https://www.bioconductor.org/packages/release/bioc/vignettes/edgeR/inst/doc/edgeRUsersGuide.p](https://www.bioconductor.org/packages/release/bioc/vignettes/edgeR/inst/doc/edgeRUsersGuide.pdf)  
1185 [df](https://www.bioconductor.org/packages/release/bioc/vignettes/edgeR/inst/doc/edgeRUsersGuide.pdf)).

1186 **B)** Quantification by RNA-seq (FPKM) of Up-regulated (left panel) and Down-regulated (right panel)  
1187 DEGs in *Charme*<sup>KO</sup> vs *Charme*<sup>WT</sup> neonatal hearts.

1188 **C)** Quantification by RNA-seq (FPKM) of *pCharme* and *Charme*-neighbouring genes expression in  
1189 *Charme*<sup>WT</sup> vs *Charme*<sup>KO</sup> neonatal hearts.

1190 **D)** Left panel: Representative images for KI-67 (green) and DAPI (blue) stainings on *Charme*<sup>WT</sup> and  
1191 *Charme*<sup>KO</sup> neonatal cardiac sections. Scale bars: 70  $\mu$ m. Right panel: Quantification of KI-67 positive  
1192 nuclei/total nuclei on *Charme*<sup>WT</sup> and *Charme*<sup>KO</sup> cardiac sections from neonatal mice. Data are  
1193 expressed as mean  $\pm$  SEM, n = 4.

1194 **E)** Left panel: RT-qPCR quantification of DEGs belonging to the “cell cycle” GO class from  
1195 *Charme*<sup>WT</sup> and *Charme*<sup>KO</sup> E15.5 hearts. Data were normalized to *Gapdh* mRNA and represent means  
1196  $\pm$  SEM of n=3 heart pools. Right panel: Representative images for KI-67 (green) and DAPI (blue)  
1197 stainings on *Charme*<sup>WT</sup> and *Charme*<sup>KO</sup> E15.5 cardiac sections are shown. Quantification of KI-67  
1198 positive nuclei/total nuclei on *Charme*<sup>WT</sup> and *Charme*<sup>KO</sup> cardiac sections from E15.5 mice. Data are  
1199 mean  $\pm$  SEM.; n =3. Scale bars: 140  $\mu$ m.

1200 **F)** Western blot analysis for NPPA in *Charme*<sup>WT</sup> and *Charme*<sup>KO</sup> E15.5 cardiac extracts.  $\beta$ -ACTIN  
1201 was used as a loading control. Quantification of NPPA signal intensity relative to  $\beta$ -ACTIN is shown  
1202 below. Data are mean  $\pm$  SEM (n = 3). \*p= 0.03. A representative image is shown.

1203 **G)** RT-qPCR quantification of trabeculae markers expression in *Charme*<sup>WT</sup> vs *Charme*<sup>KO</sup> E15.5  
1204 cardiac extracts. Data were normalized to *Gapdh* mRNA and represent means  $\pm$  SEM of n=3 heart  
1205 pools.

1206 **H)** Representative image of Lectin (green) and TnnT2 (red) immunostainings in *Charme*<sup>WT</sup> and  
1207 *Charme*<sup>KO</sup> E15.5 cardiac sections. ROI (orange squares) were digitally enlarged on the lower panels.  
1208 Scale bars: 500  $\mu$ m. Quantification of the area covered by the Lectin fluorescence signal is shown  
1209 aside. For each genotype, data represent the mean  $\pm$  SEM of (at least) 6 images. n=3.

1210 **I)** Representative M-mode echocardiographic track of *Charme*<sup>WT</sup> and *Charme*<sup>KO</sup> 9-12 months aged  
1211 mice. Quantification of heart morphology (EDD= end-diastolic diameter and ESD= end-systolic  
1212 diameter) and function (FS: Fractional Shortening  $=$ (EDD-ESD)/EDD) were evaluated. Data  
1213 represent the mean  $\pm$  SEM (n = 10-13)

1214 Data information: \*p < 0.05, \*\*p < 0.01, \*\*\*p < 0.001, unpaired Student's t test.

1215



**Figure 3-figure supplement 1**

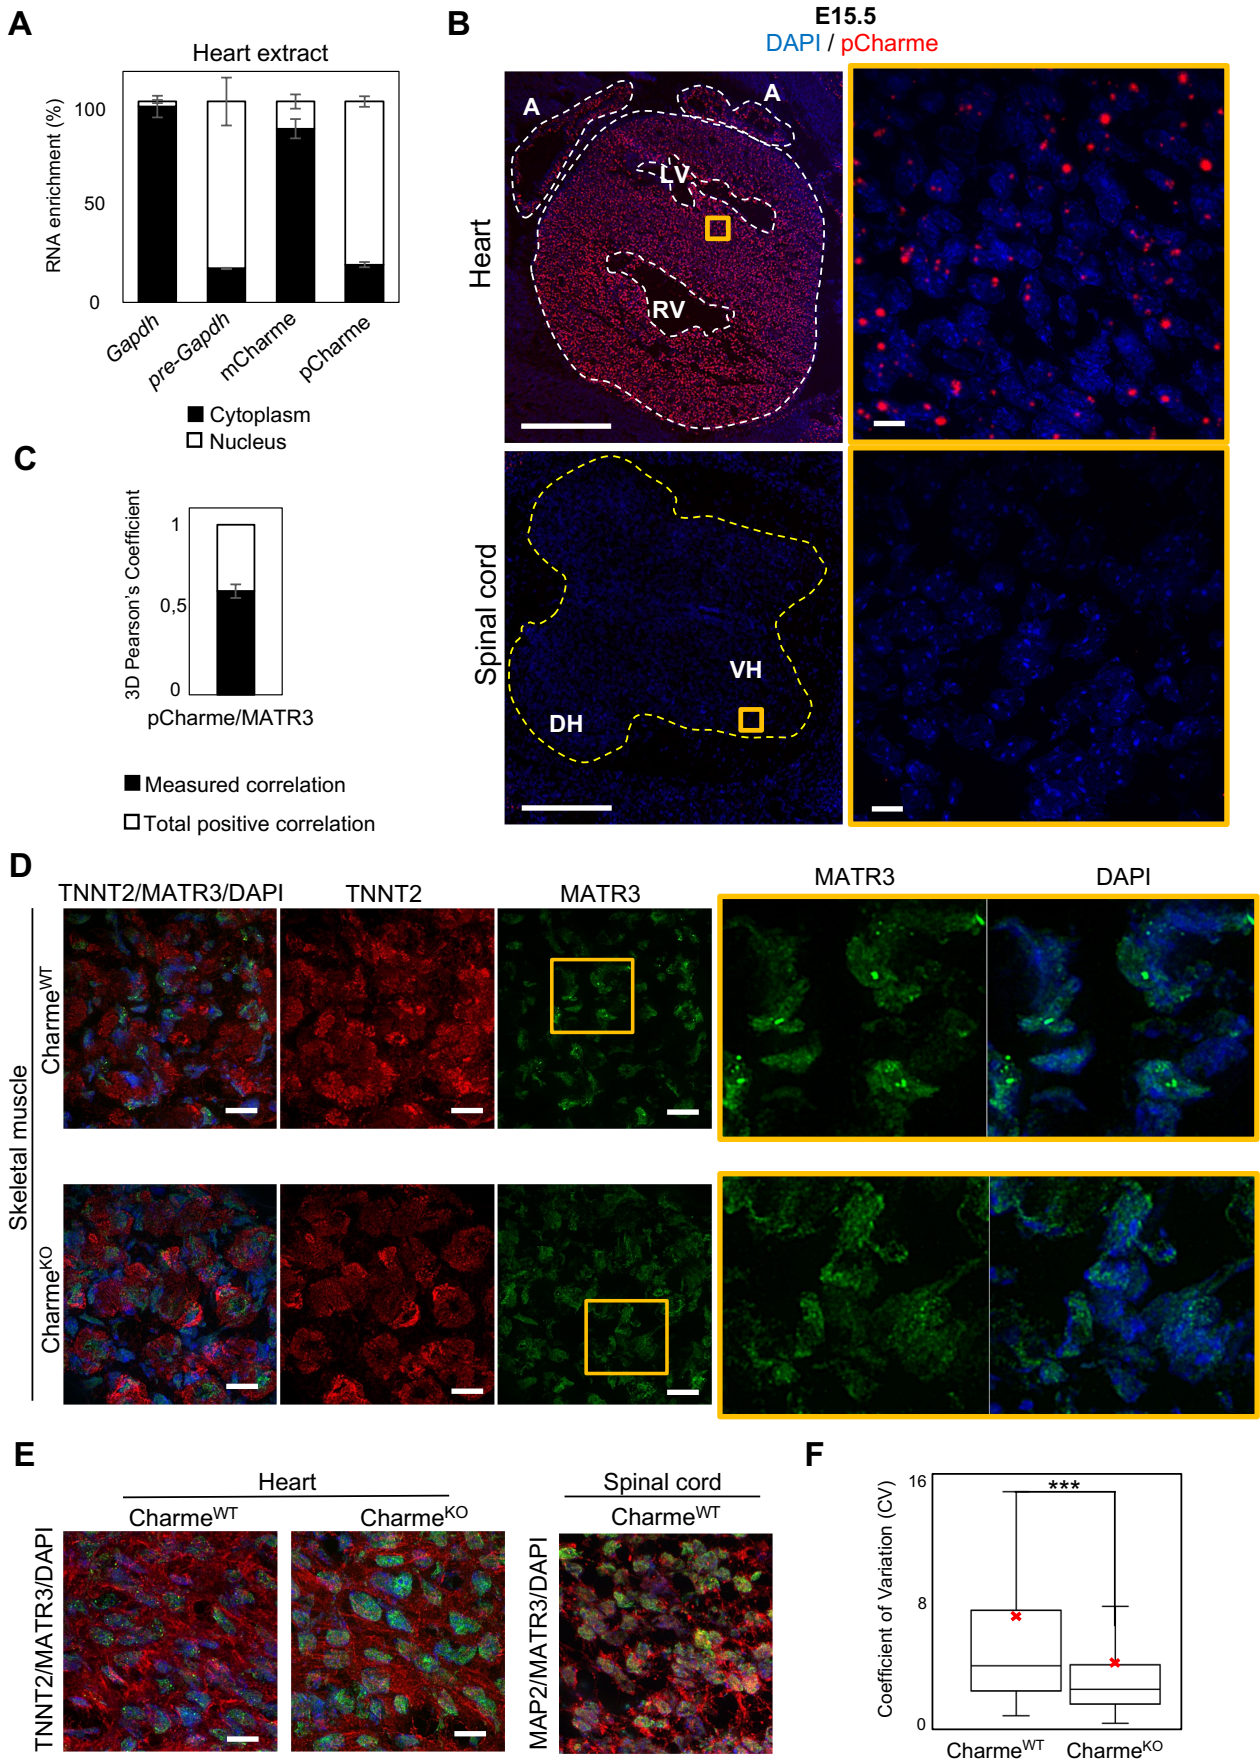

1217 **Figure 3-Figure supplement 1. Related to Figure 3**

1218 **A)** Quantification of the subcellular distribution of pCharme and mCharme in cardiac tissues from  
1219 neonatal mice. Histogram shows the quantification by RT-qPCR of the RNA abundance (%) in  
1220 cytoplasmic *versus* nuclear compartments. *Gapdh* and *pre-Gapdh* RNAs were used, respectively, as  
1221 cytoplasmic and nuclear controls.

1222 **B)** RNA-FISH for pCharme (red) and DAPI staining (blue) in Charme<sup>WT</sup> hearts and spinal cord from  
1223 E15.5 tissue sections (left panels) and their magnification (right panels). Whole heart (white dashed  
1224 lines), spinal cord (yellow dashed line). A: Atria; LV and RV: Left and Right ventricle; DH and VH:  
1225 Dorsal and Ventral Horn. Scale bars, 500  $\mu$ m; 10  $\mu$ m for magnifications.

1226 **C)** 3D Pearson's correlation coefficient of pCharme/MATR3 overlapping signals. Histogram shows  
1227 the mean  $\pm$  SEM calculated over 237 colocalized nuclear signals from 3 independent experiments.

1228 **D)** Representative images for for MATR3 (green), TnnT2 (red) and DAPI (blue) stainings on  
1229 Charme<sup>WT</sup> and Charme<sup>KO</sup> skeletal muscles from E15.5 tissue sections. ROI (orange squares) were  
1230 digitally enlarged on the right panels. Each image is a representative of three individual samples.  
1231 Scale bars, 10  $\mu$ m.

1232 **E)** Left panel: Representative images for for MATR3 (green), TnnT2 (red) and DAPI (blue) stainings  
1233 on Charme<sup>WT</sup> and Charme<sup>KO</sup> heart from E15.5 tissue sections. Right panel: Representative images for  
1234 MATR3 (green), Map2 (red) and DAPI (blue) stainings on Charme<sup>WT</sup> and Charme<sup>KO</sup> spinal cord from  
1235 E15.5 tissue sections. Each image is a representative of three individual samples. Scale bars, 10  $\mu$ m.

1236 **F)** Quantification of MATR3 fluorescence intensity distribution (CV=Coefficient of variation) in  
1237 Charme<sup>WT</sup> (N=1346 nuclei) and Charme<sup>KO</sup> (N=1404 nuclei). The red X indicate the mean value of  
1238 CV distribution.

1239

## Figure 4-figure supplement 1

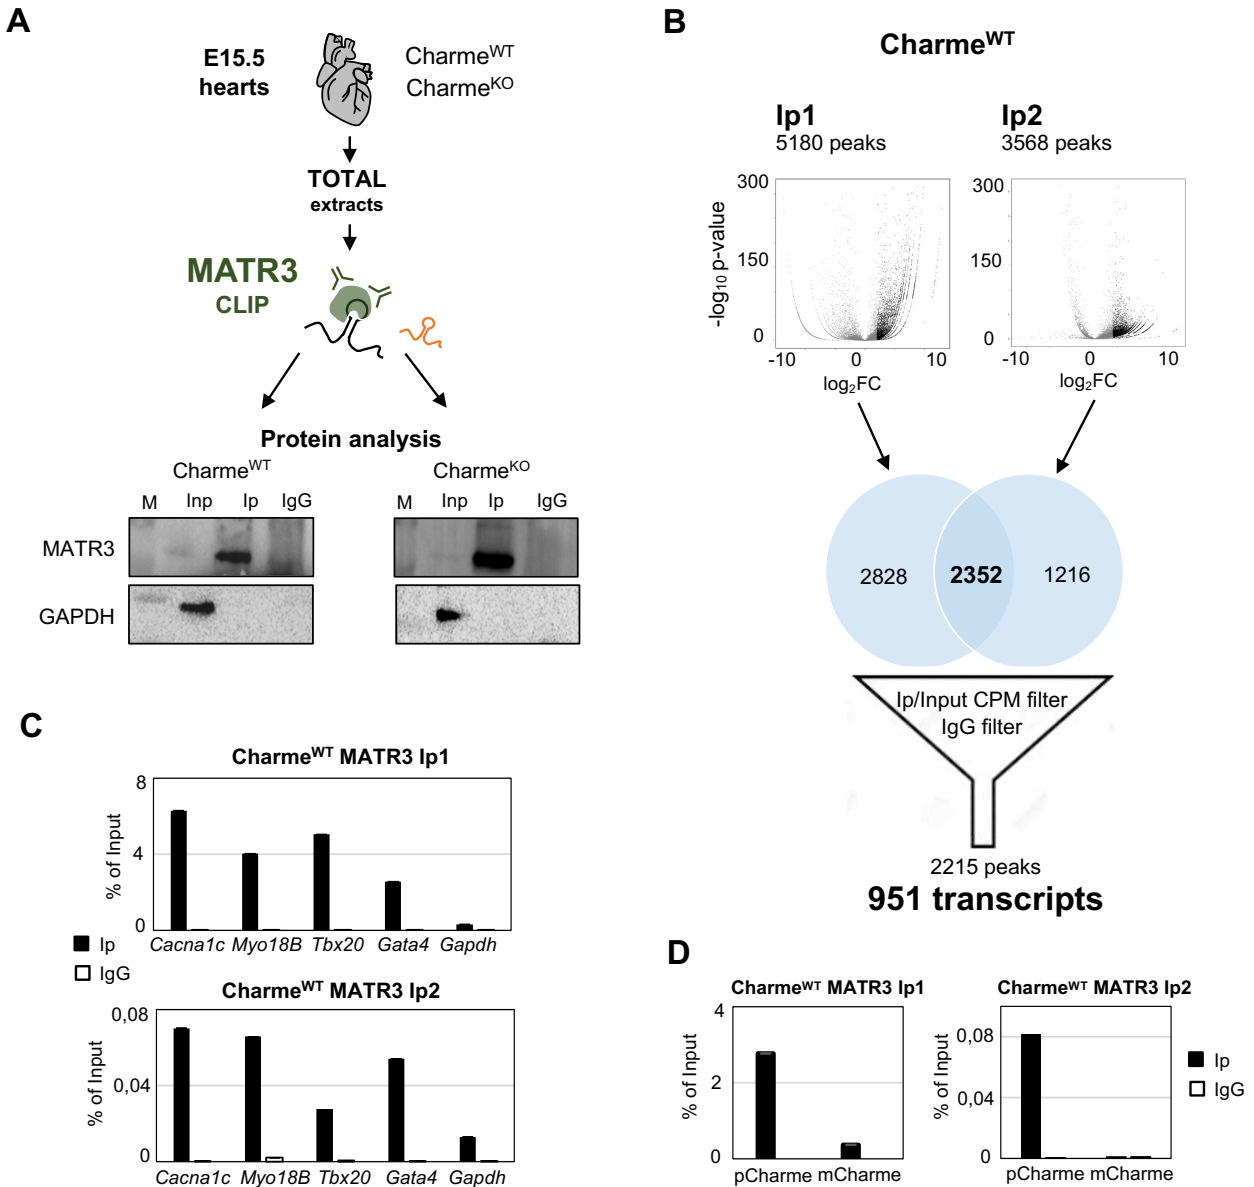

1240

1241 **Figure 4-Figure supplement 1. Related to Figure 4**

1242 **A)** Schematic representation of MATR3-CLIP assay as performed from fetal hearts (E15.5) in  
 1243 Charme<sup>WT</sup> and Charme<sup>KO</sup> conditions. MATR3 western blot analysis on the retrieved protein fractions  
 1244 is shown. GAPDH protein serves as a loading control. Input (Inp) samples represent 10% of the total  
 1245 protein extracts.

1246 **B)** Schematic representation of the workflow used for MATR3 CLIP-seq analysis. Volcano plots  
 1247 represent the fold-enrichment over Input ( $\log_2$  Fold enrichment, x-axis) and significance ( $-\log_{10}$  p-

1248 value, y-axis) of MATR3 peaks in the Ip1 (left panel) and Ip2 (right panel) samples. Black dots  
1249 represent the significantly enriched peaks ( $\log_2$  Fold enrichment  $> 2$  and FDR  $< 0.05$ ). Venn diagrams  
1250 depict the intersection between Ip1 and Ip2 significantly enriched peaks. The 2215 filtered peaks  
1251 correspond to the 951 MATR3-bound transcripts. CPM: Counts Per Million. See Materials and  
1252 Methods for details.

1253 **C)** RT-qPCR quantification of *Cacna1c*, *Myo18B*, *Tbx20* and *Gata4* RNA recovery in MATR3 Ip1  
1254 (upper panel), Ip2 (lower panel) and IgG Charm<sup>WT</sup> samples. *Gapdh* transcript serves as negative  
1255 control. Values are expressed as percentage (%) of Input.

1256 **D)** RT-qPCR quantification of pCharme and mCharme RNA recovery in MATR3 Ip1 (left panel),  
1257 Ip2 (right panel) and IgG Charm<sup>WT</sup> samples. Values are expressed as percentage (%) of Input.

1258

## Figure 5-figure supplement 1

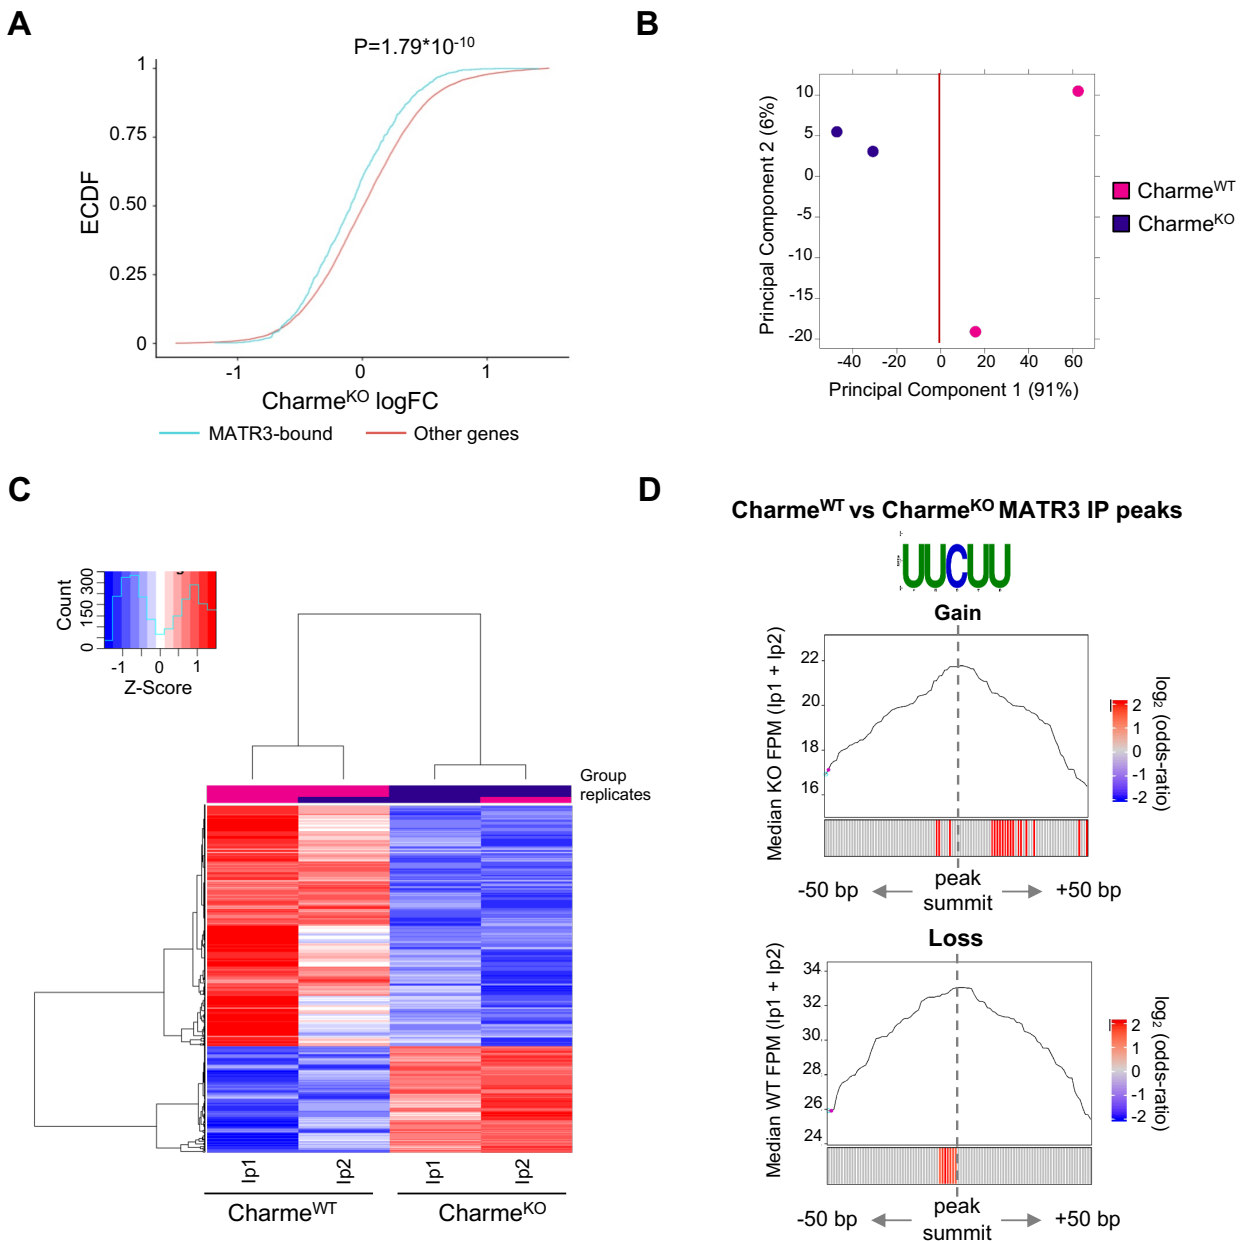

1259

1260 **Figure 5-Figure supplement 1. Related to Figure 5**

1261 **A)** Empirical Cumulative Distribution Functions (ECDF) showing the RNA abundance of MATR3  
 1262 targets in Charme<sup>KO</sup> condition compared to the other expressed genes. Significance was determined  
 1263 using a two-sided Kolmogorov–Smirnov (KS) test.

1264 **B)** Principal Component analysis (PCA) plot of Charme<sup>WT</sup> and Charme<sup>KO</sup> MATR3 CLIP-seq peaks.  
 1265 Plot was obtained from DiffBind package. See Material and Methods for details.

1266 **C)** Heatmap visualization of Charm<sup>WT</sup> and Charm<sup>KO</sup> MATR3 CLIP-seq peaks. Plot was produced  
1267 by DiffBind package. Z-Score of normalized reads counts is shown. See Material and Methods for  
1268 details.

1269 **D)** Positional enrichment analysis of MATR3 motif in differential MATR3 CLIP-seq peaks  
1270 (Charm<sup>WT</sup> vs Charm<sup>KO</sup>). For each analysed position close to peak summit, line plot displays the  
1271 median CLIP-seq signal (FPM, IP1 + IP2) while heatmap displays the log<sub>2</sub> odds-ratio of UUCUU  
1272 motif enrichment. Significant enrichments (p-value < 0.05) are shown in red. See Material and  
1273 Methods for details. CLIP-seq signal in Charm<sup>KO</sup> and Charm<sup>WT</sup> conditions is displayed for «Gain»  
1274 and «Loss» peaks, respectively.

1275

1276 **Supplementary File 1. Charm Tss usage data collected from Zenbu genome browser**

1277 **Supplementary File 2. RNA-seq in Charm<sup>WT</sup> and Charm<sup>KO</sup> neonatal hearts**

1278 **Supplementary File 3. Ecocardiography measurement for Charm<sup>WT</sup> and Charm<sup>KO</sup> animals.**

1279 **Supplementary File 4. MATR3 CLIP-seq in Charm<sup>WT</sup> and Charm<sup>KO</sup> fetal hearts**

1280 **Supplementary File 5. List and sequences of the oligonucleotides, siRNAs, antibodies and**  
1281 **imaging probes used.**

1282
